# Supplementary material for: Steroidal Saponins from the Roots and Rhizomes of Tupistra chinensis
Source: MDPI journal article supplement (doi:10.3390/molecules200813659), 2015-07-28
Supplement: s1 [file s1]

# Supplementary Materials

## List of Content

| No. | Content                                                                                                           | Page |
|-----|-------------------------------------------------------------------------------------------------------------------|------|
| 1   | <b>Figure S1.</b> The IR spectrum of <b>1</b> (in KBr)                                                            | S2   |
| 2   | <b>Figure S2.</b> The HR-ESI-MS spectrum of <b>1</b> (in MeOH)                                                    | S3   |
| 3   | <b>Figure S3.</b> The $^1\text{H}$ -NMR spectrum of <b>1</b> (in $\text{C}_5\text{D}_5\text{N}$ )                 | S4   |
| 4   | <b>Figure S4.</b> The $^{13}\text{C}$ -NMR spectra of <b>1</b> (in $\text{C}_5\text{D}_5\text{N}$ )               | S5   |
| 5   | <b>Figure S5.</b> The HMQC spectrum of <b>1</b> (in $\text{C}_5\text{D}_5\text{N}$ )                              | S6   |
| 6   | <b>Figure S6.</b> The HMBC spectrum of <b>1</b> (in $\text{C}_5\text{D}_5\text{N}$ )                              | S7   |
| 7   | <b>Figure S7.</b> The ROESY spectrum of <b>1</b> (in $\text{C}_5\text{D}_5\text{N}$ )                             | S8   |
| 8   | <b>Figure S8.</b> The IR spectrum of <b>2</b> (in KBr)                                                            | S9   |
| 9   | <b>Figure S9.</b> The HR-ESI-MS spectrum of <b>2</b> (in MeOH)                                                    | S10  |
| 10  | <b>Figure S10.</b> The $^1\text{H}$ -NMR spectrum of <b>2</b> (in $\text{C}_5\text{D}_5\text{N}$ )                | S11  |
| 11  | <b>Figure S11.</b> The $^{13}\text{C}$ -NMR spectra of <b>2</b> (in $\text{C}_5\text{D}_5\text{N}$ )              | S12  |
| 12  | <b>Figure S12.</b> The HMQC spectrum of <b>2</b> (in $\text{C}_5\text{D}_5\text{N}$ )                             | S13  |
| 13  | <b>Figure S13.</b> The $^1\text{H}$ - $^1\text{H}$ COSY spectrum of <b>2</b> (in $\text{C}_5\text{D}_5\text{N}$ ) | S14  |
| 14  | <b>Figure S14.</b> The HMBC spectrum of <b>2</b> (in $\text{C}_5\text{D}_5\text{N}$ )                             | S15  |
| 15  | <b>Figure S15.</b> The NOESY spectrum of <b>2</b> (in $\text{C}_5\text{D}_5\text{N}$ )                            | S16  |
| 16  | <b>Figure S16.</b> The IR spectrum of <b>3</b> (in KBr)                                                           | S17  |
| 17  | <b>Figure S17.</b> The HR-ESI-MS spectrum of <b>3</b> (in MeOH)                                                   | S18  |
| 18  | <b>Figure S18.</b> The $^1\text{H}$ -NMR spectrum of <b>3</b> (in $\text{C}_5\text{D}_5\text{N}$ )                | S19  |
| 19  | <b>Figure S19.</b> The $^{13}\text{C}$ -NMR spectra of <b>3</b> (in $\text{C}_5\text{D}_5\text{N}$ )              | S20  |
| 20  | <b>Figure S20.</b> The HMQC spectrum of <b>3</b> (in $\text{C}_5\text{D}_5\text{N}$ )                             | S21  |
| 21  | <b>Figure S21.</b> The $^1\text{H}$ - $^1\text{H}$ COSY spectrum of <b>3</b> (in $\text{C}_5\text{D}_5\text{N}$ ) | S22  |
| 22  | <b>Figure S22.</b> The HMBC spectrum of <b>3</b> (in $\text{C}_5\text{D}_5\text{N}$ )                             | S23  |
| 23  | <b>Figure S23.</b> The NOESY spectrum of <b>3</b> (in $\text{C}_5\text{D}_5\text{N}$ )                            | S24  |

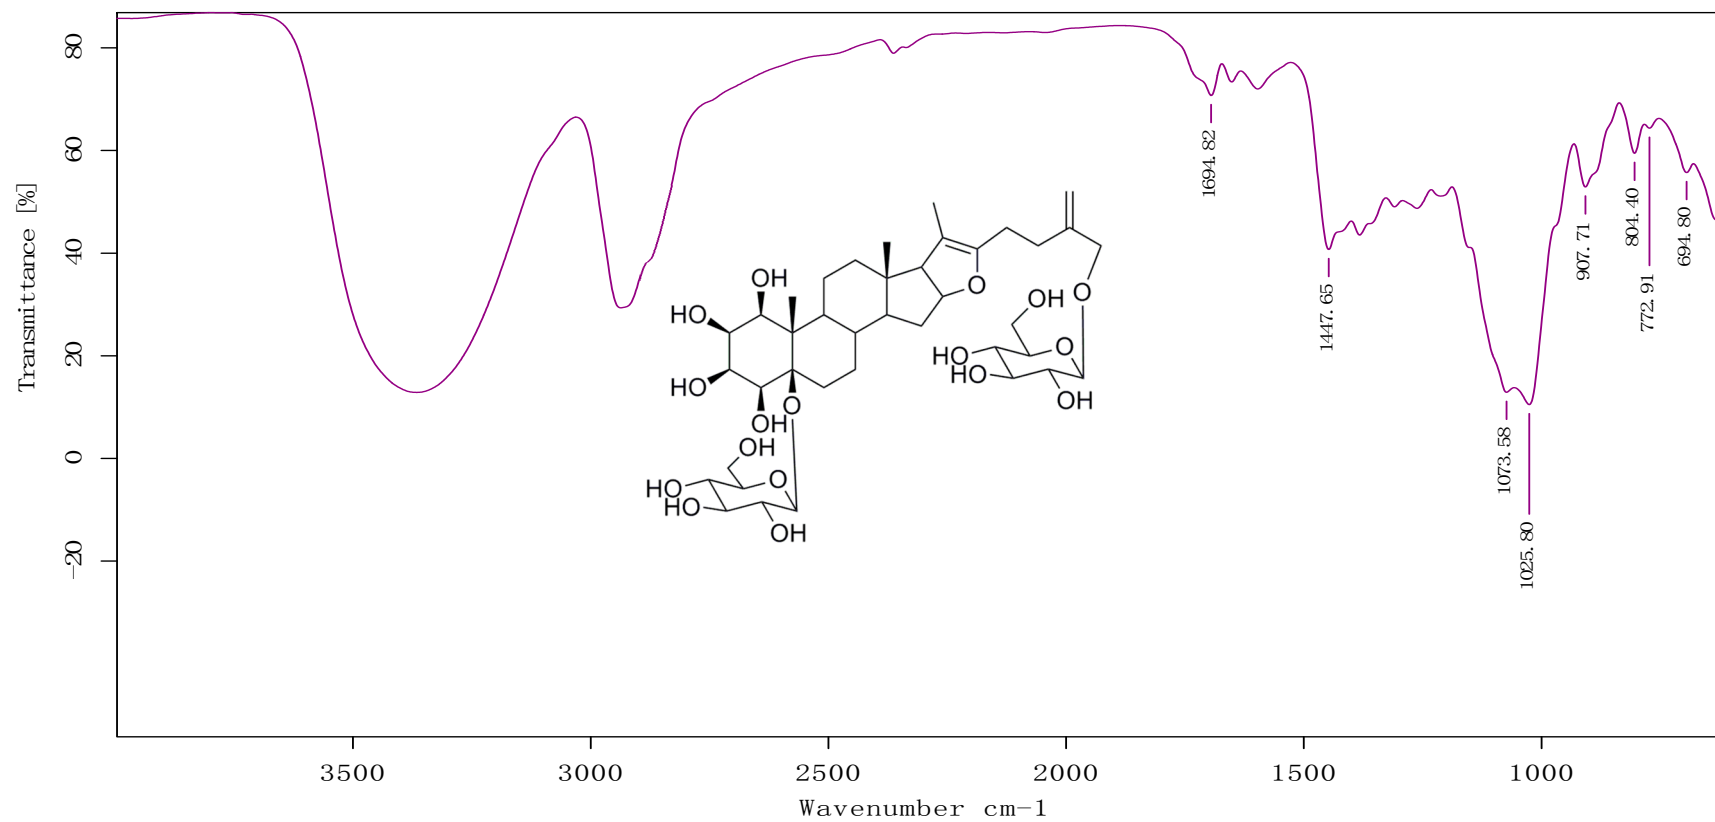

E:\ZDD\R3.1

L1样品-2

Instrument type and / or accessory

2015-1-11

Figure S1. The IR spectrum of 1 (in KBr).

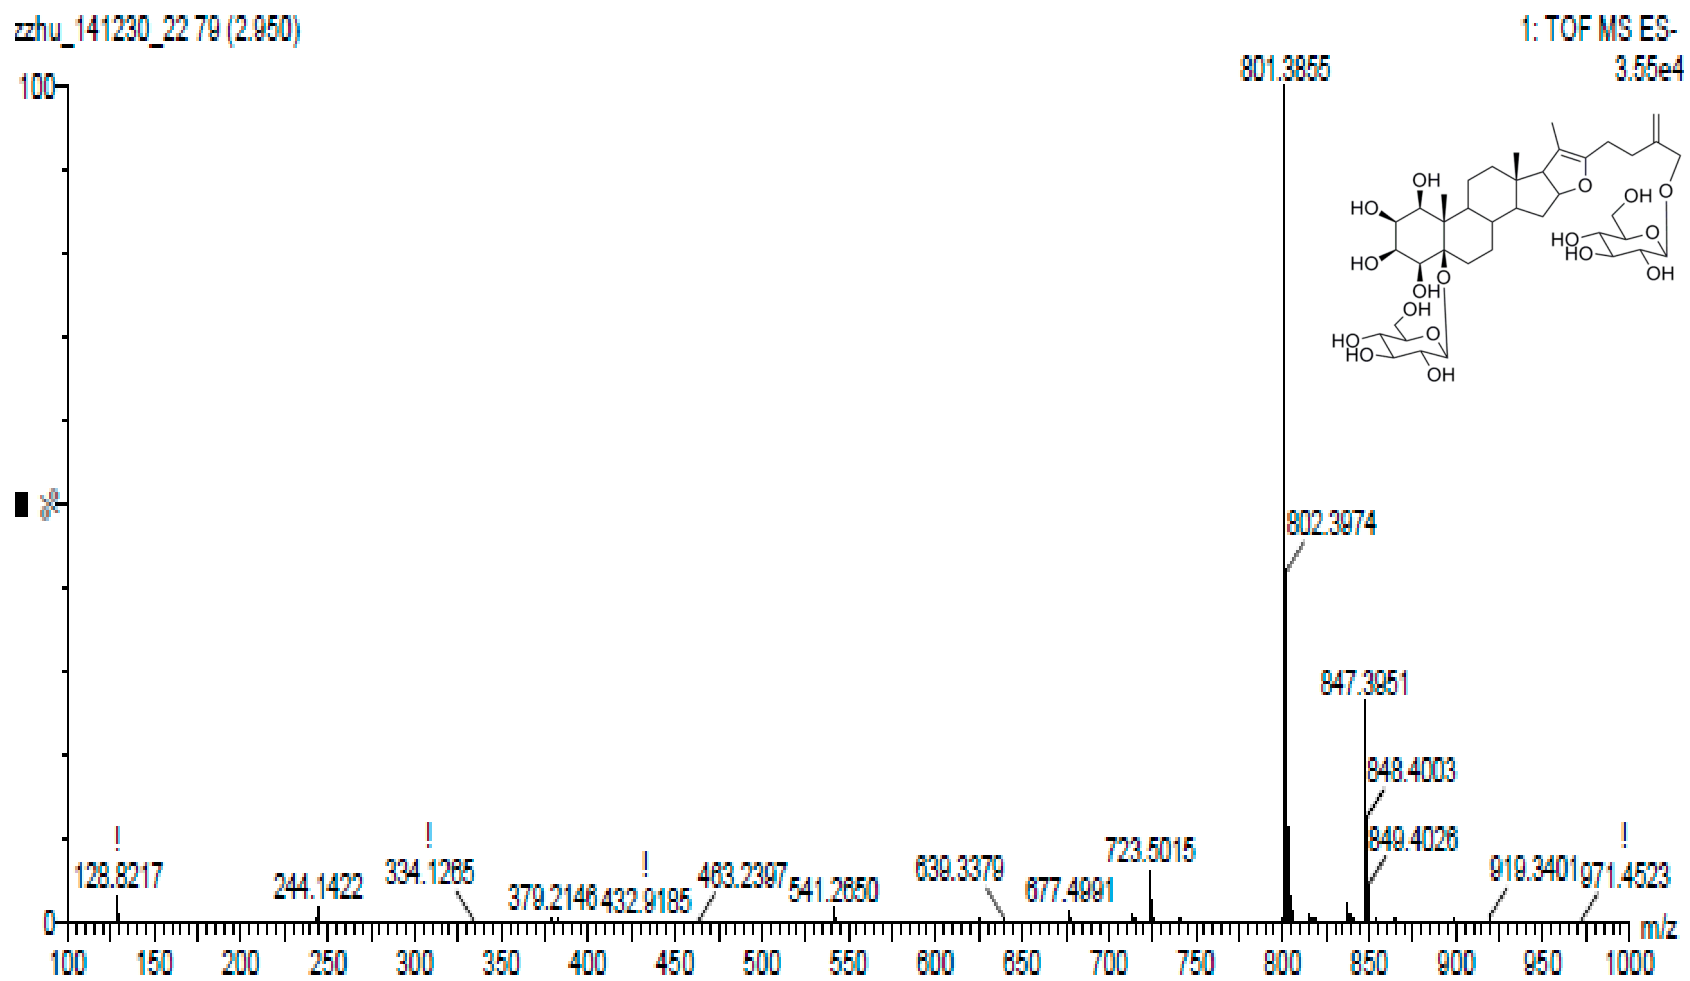

Figure S2. The HR-ESI-MS spectrum of **1** (in MeOH).

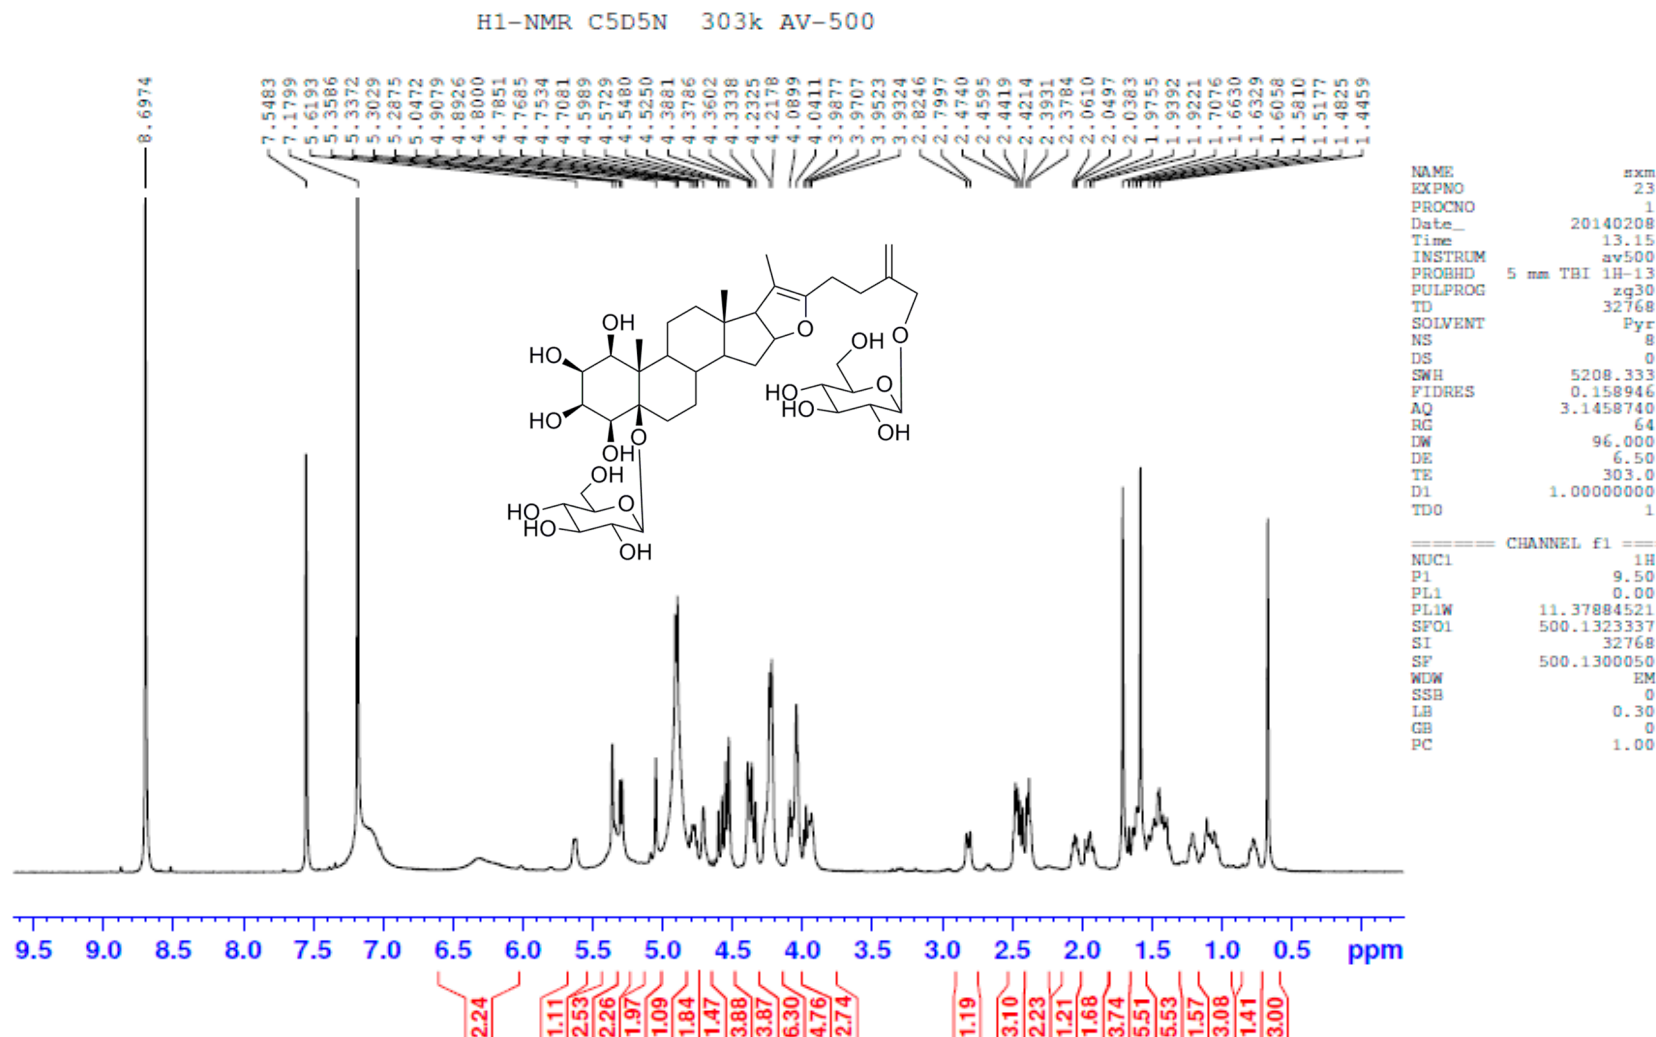

Figure S3. The  $^1\text{H}$ -NMR spectrum of **1** (in  $\text{C}_5\text{D}_5\text{N}$ ).

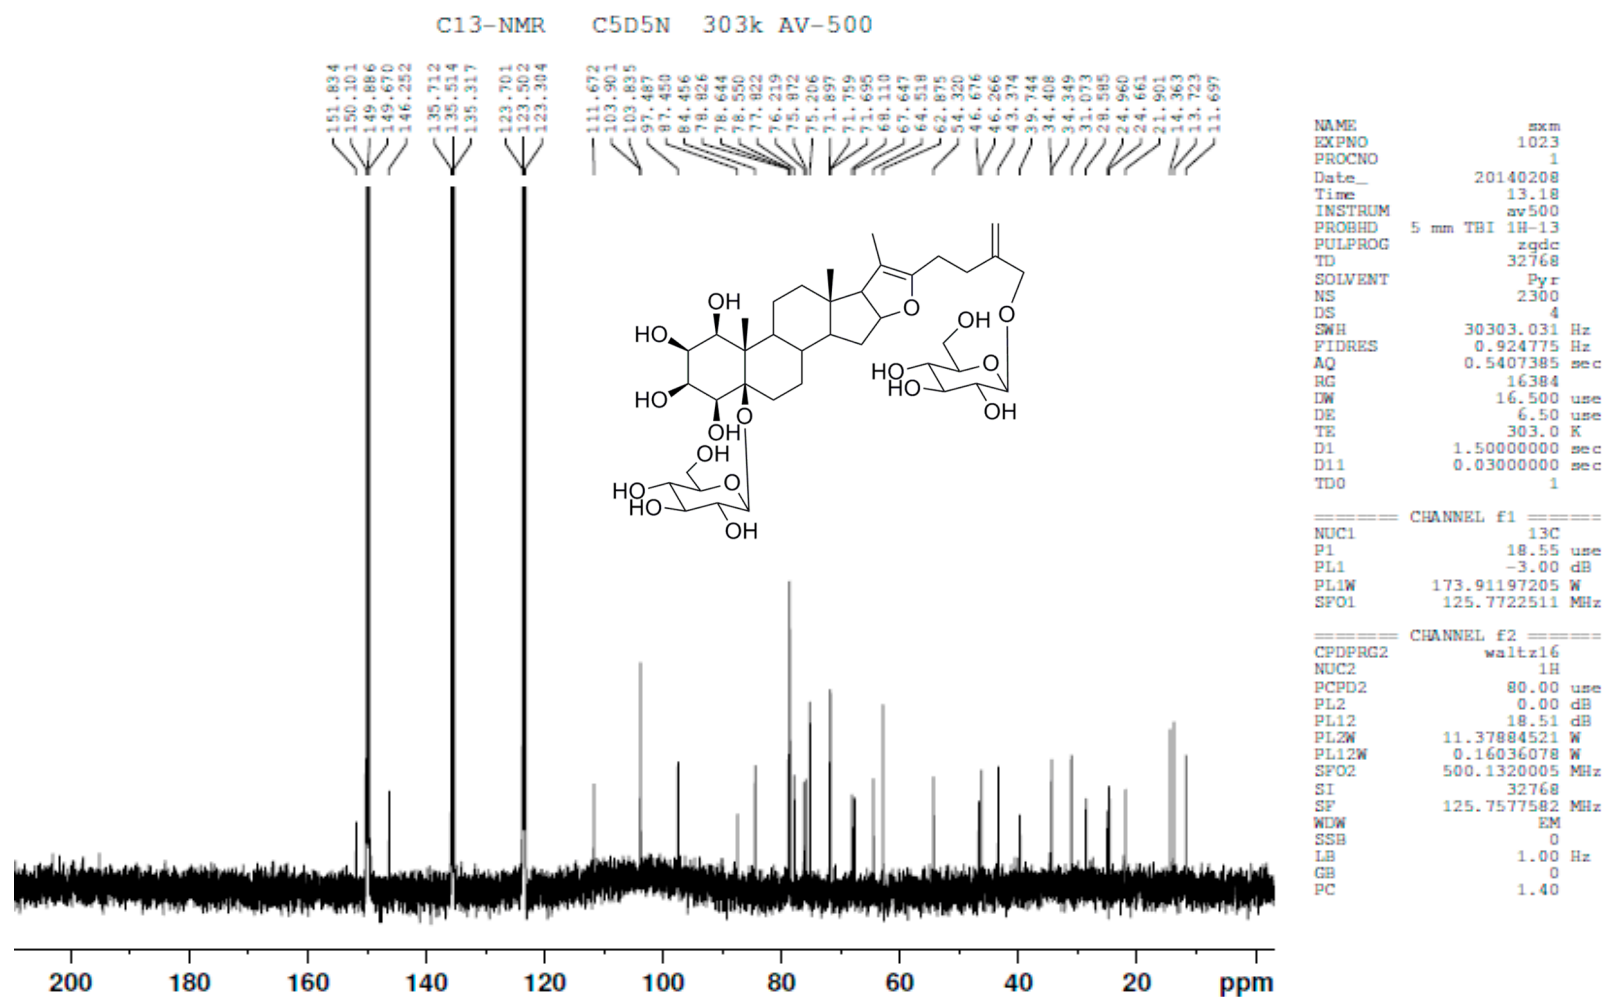

Figure S4. The  $^{13}\text{C}$ -NMR spectrum of **1** (in  $\text{C}_5\text{D}_5\text{N}$ ).

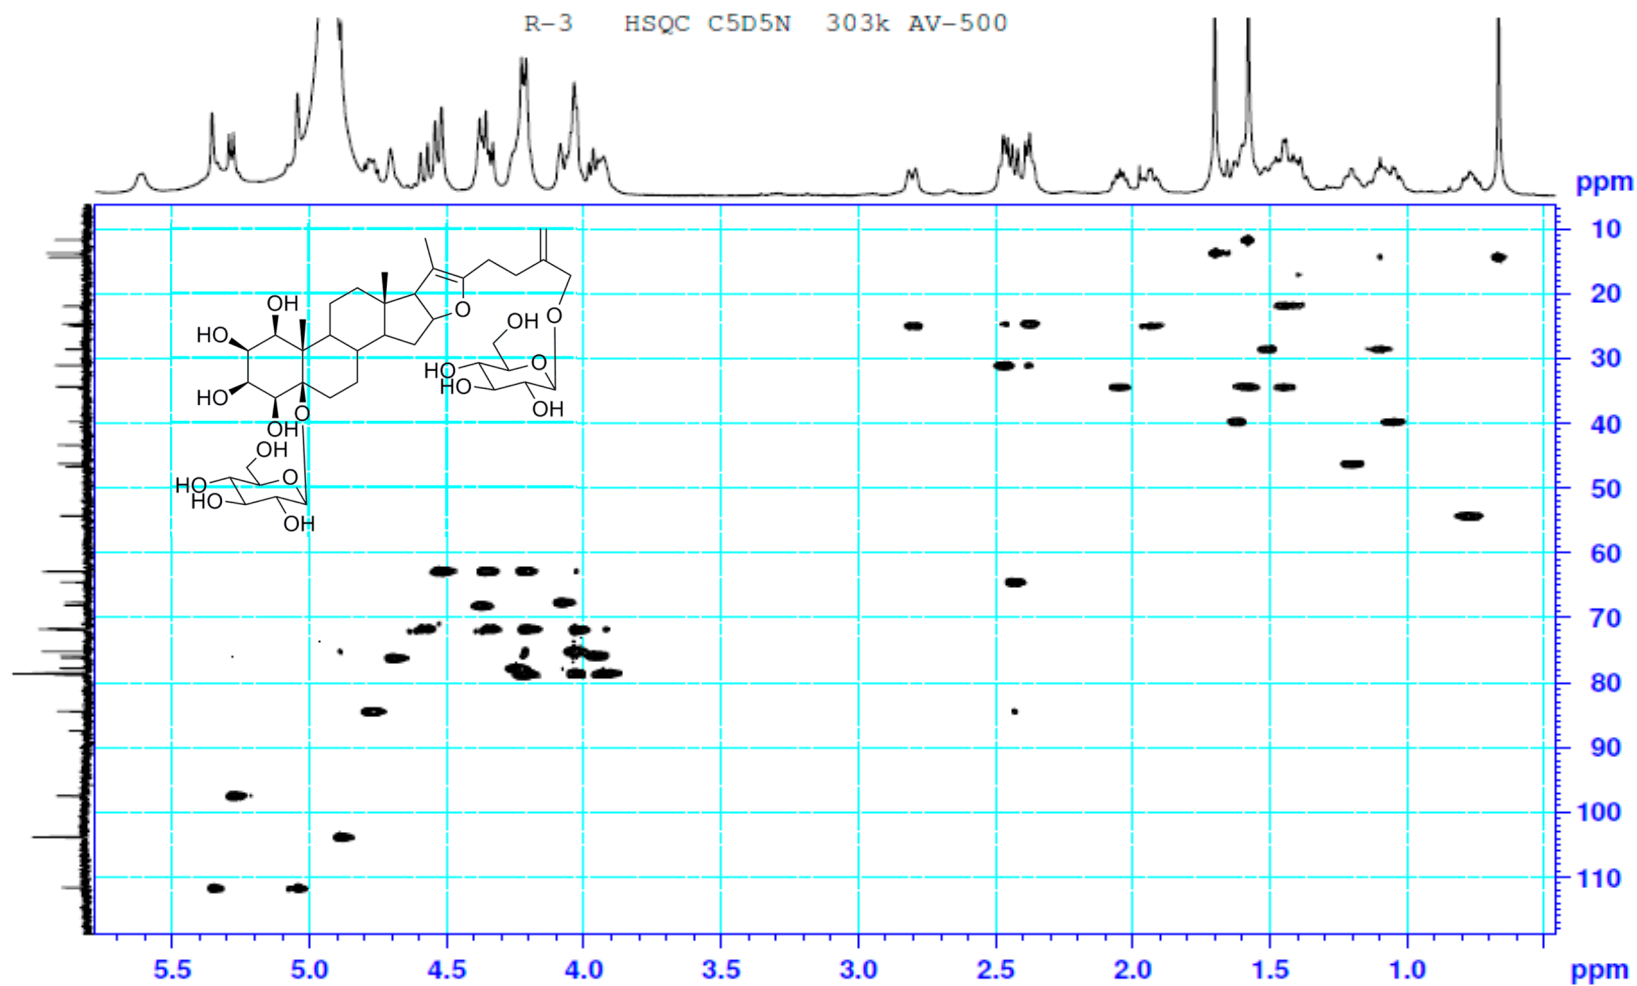

**Figure S5.** The HMQC spectrum of **1** (in  $\text{C}_5\text{D}_5\text{N}$ ).

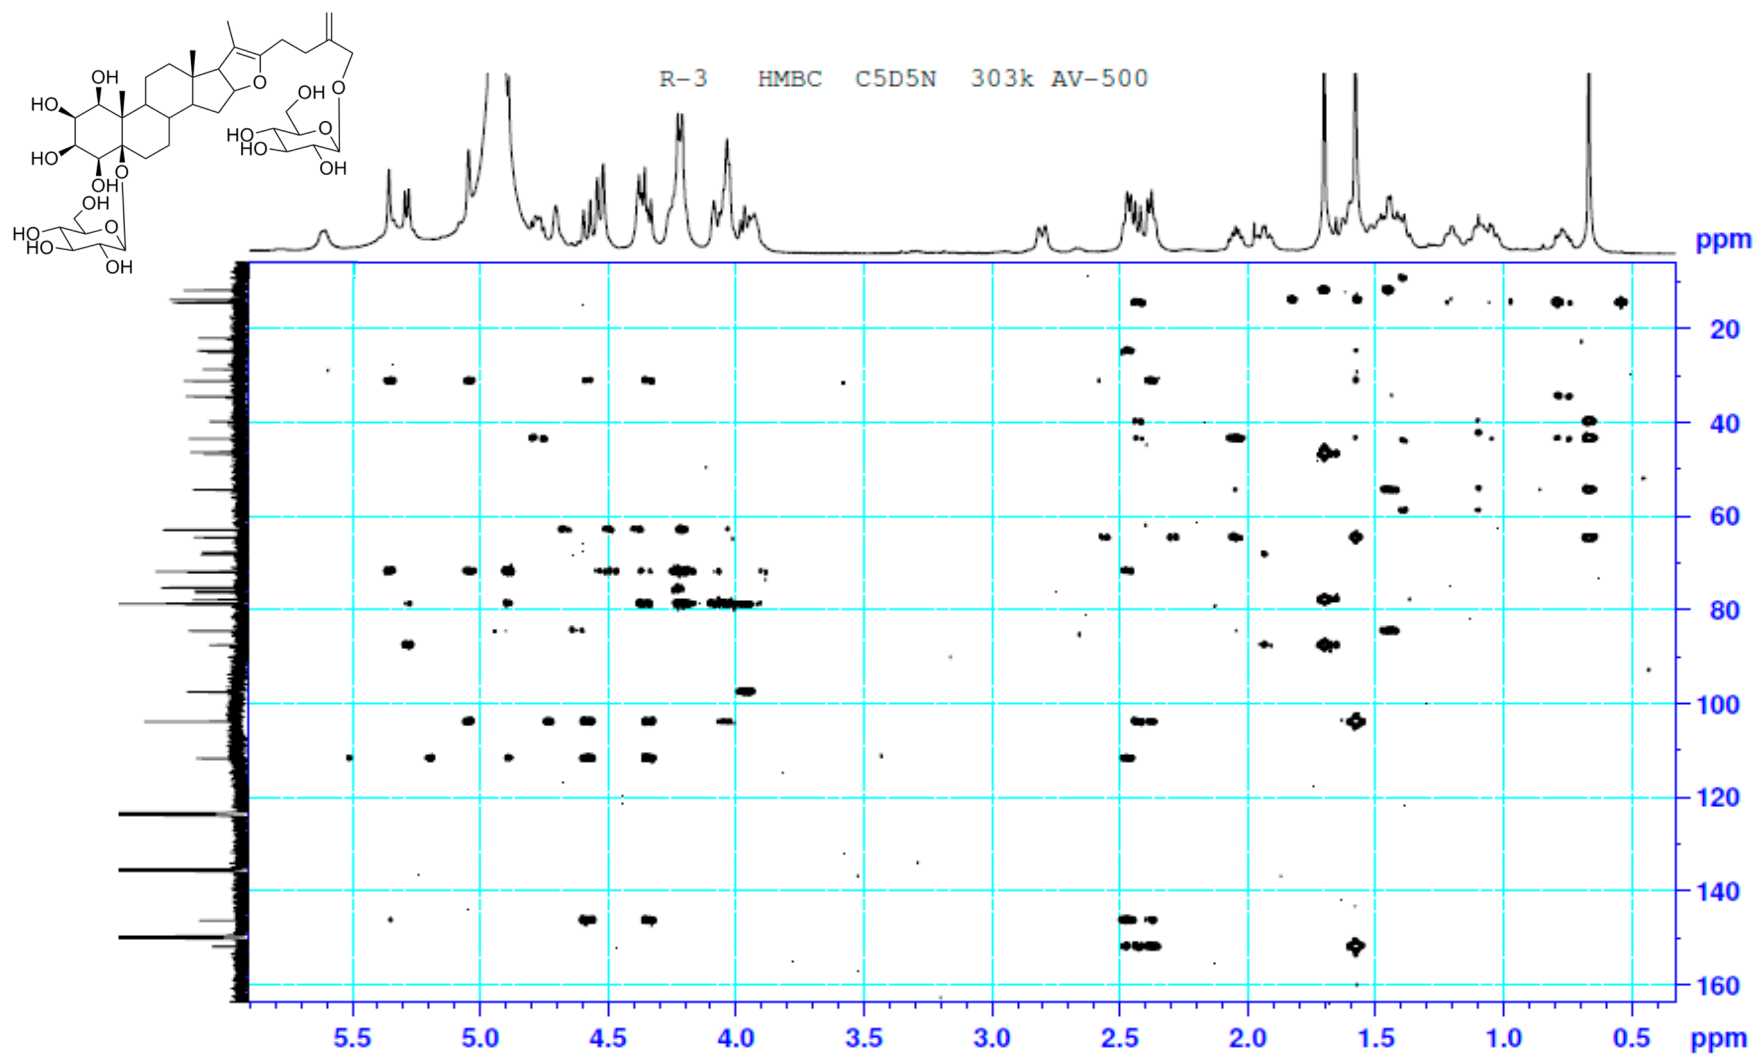

**Figure S6.** The HMBC spectrum of **1** (in  $C_5D_5N$ ).

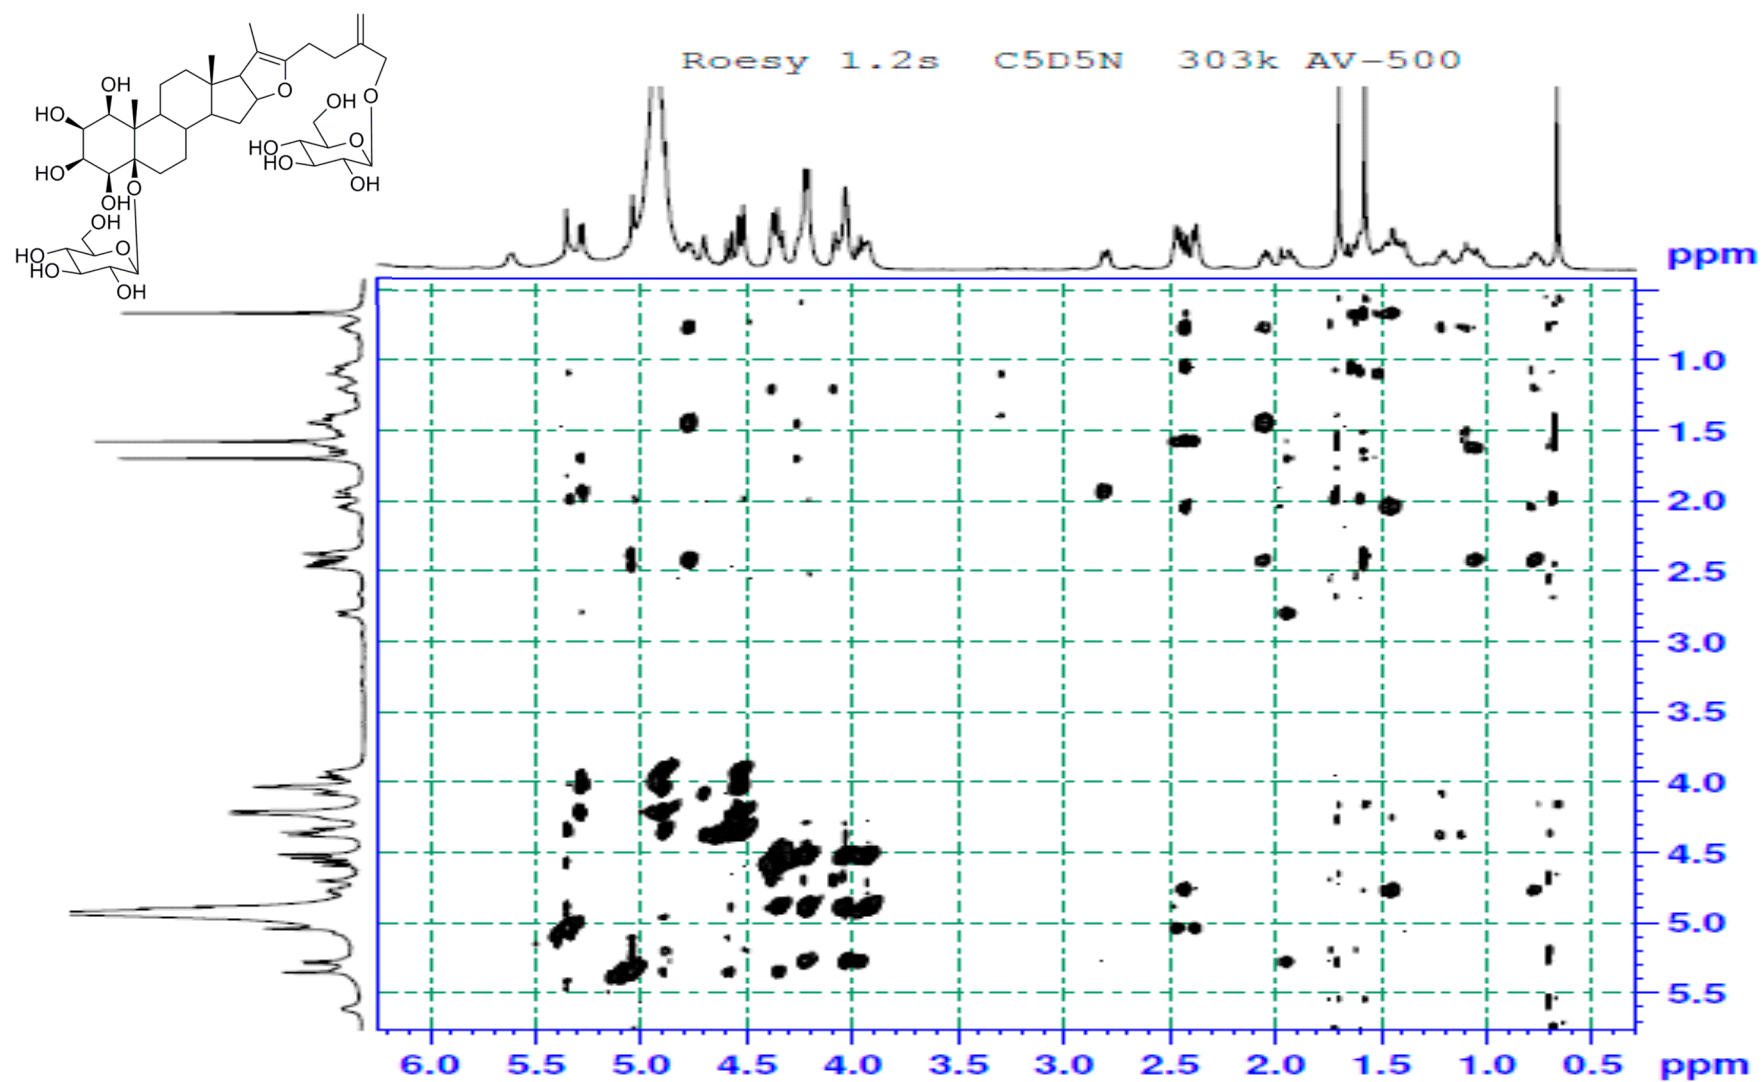

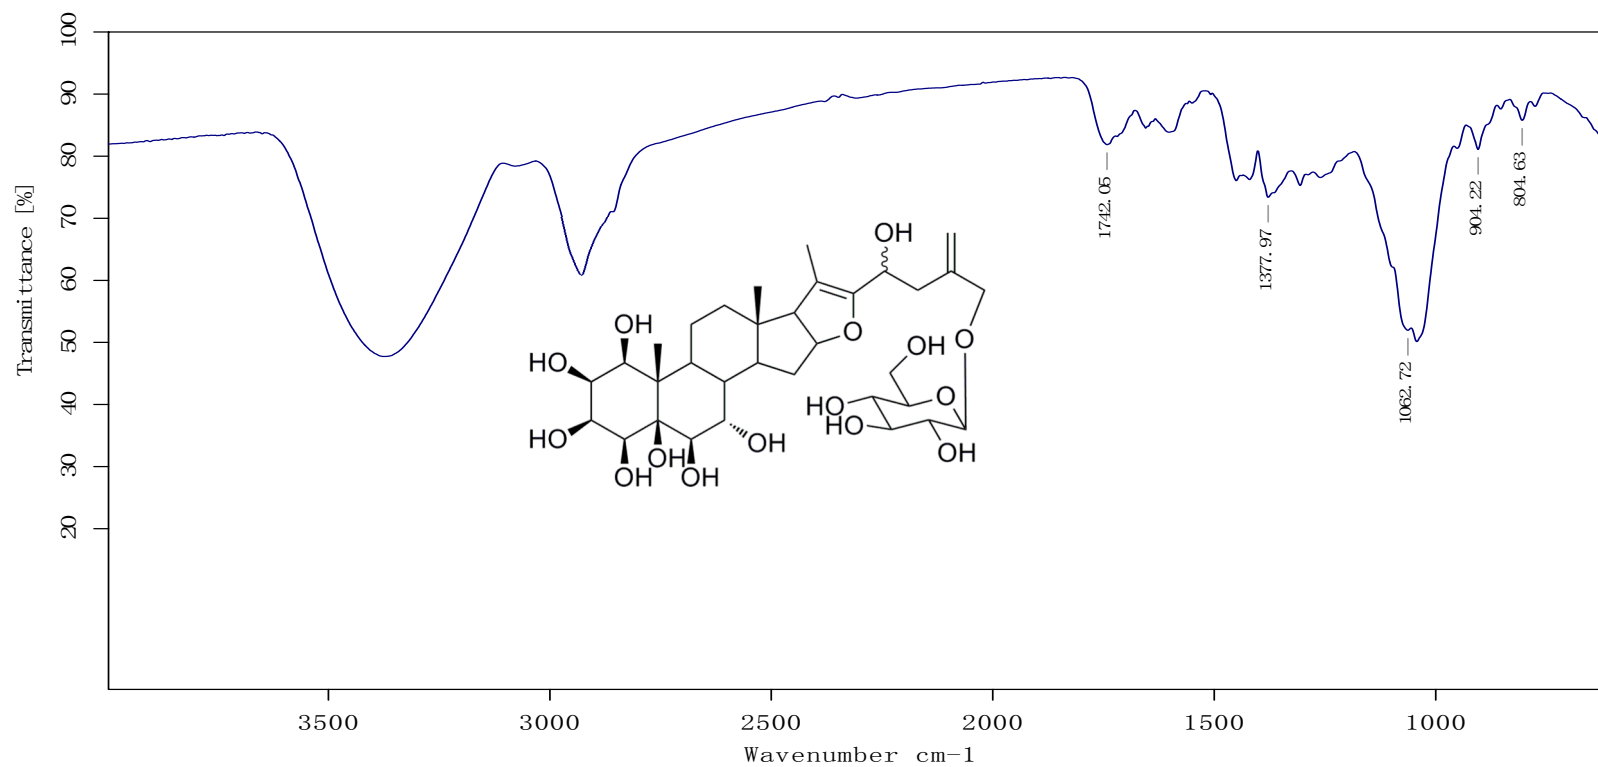

E:\ZDD\R22.1

L1样品-2

Instrument type and / or accessory

2015-1-7

**Figure S8.** The IR spectrum of **2** (in KBr).

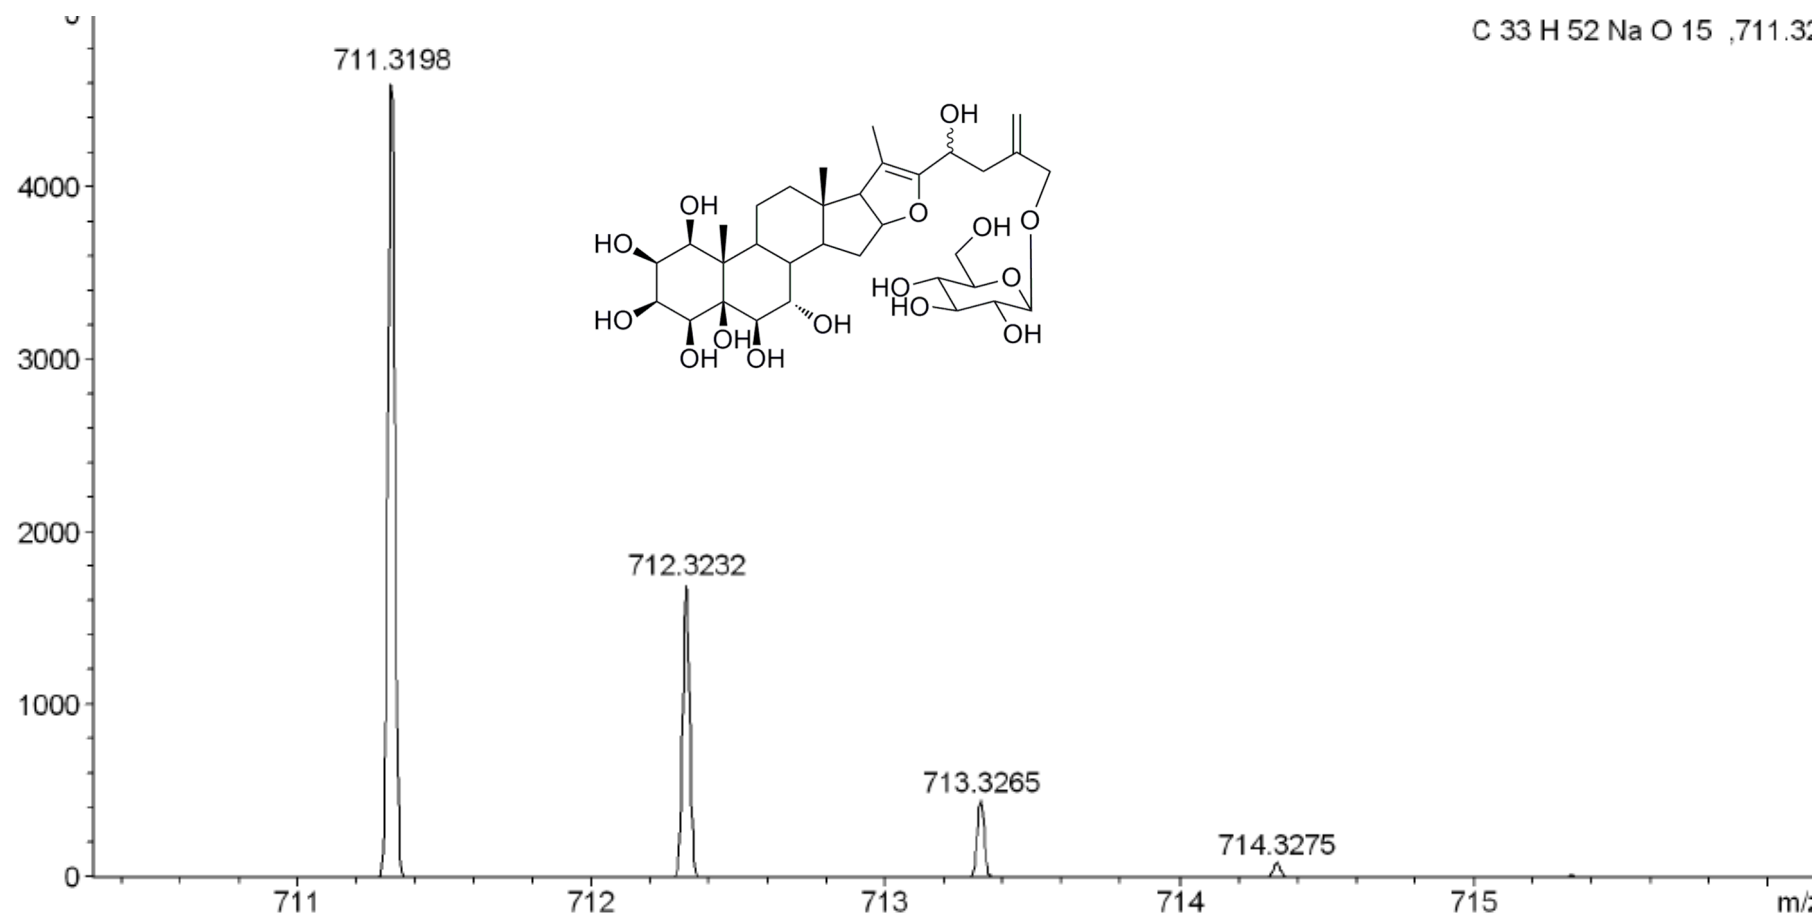

**Figure S9.** The HR-ESI-MS spectrum of **2** (in MeOH).

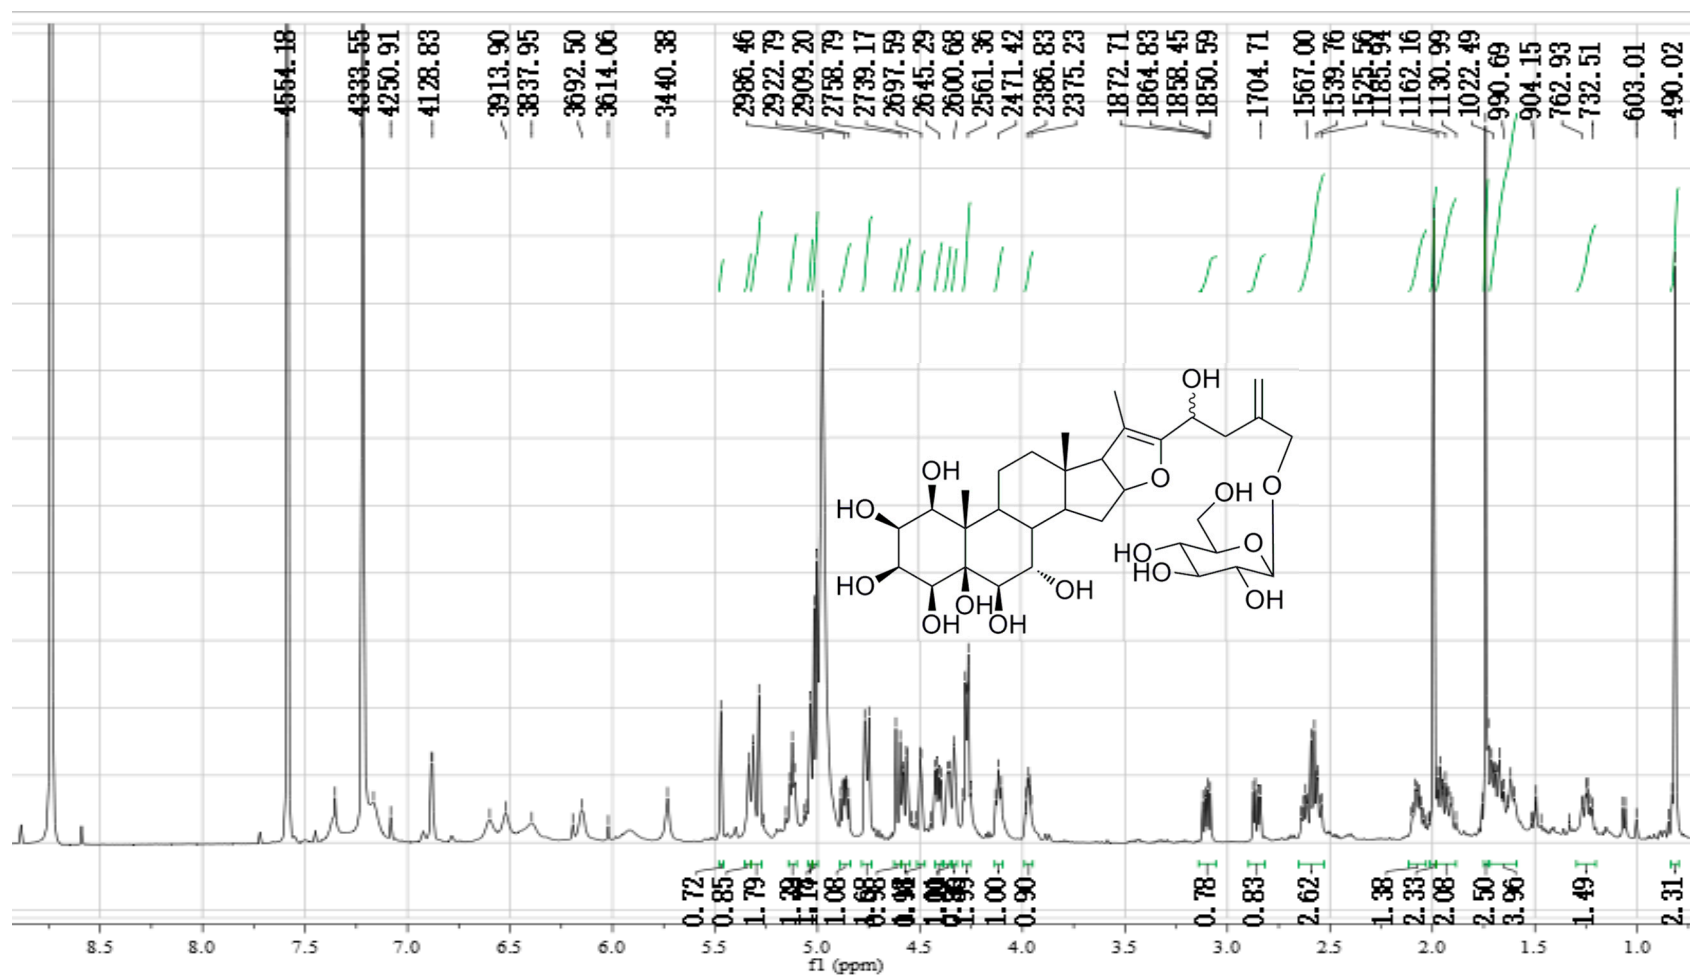

**Figure S10.** The  $^1\text{H}$ -NMR spectrum of **2** (in  $\text{C}_5\text{D}_5\text{N}$ ).

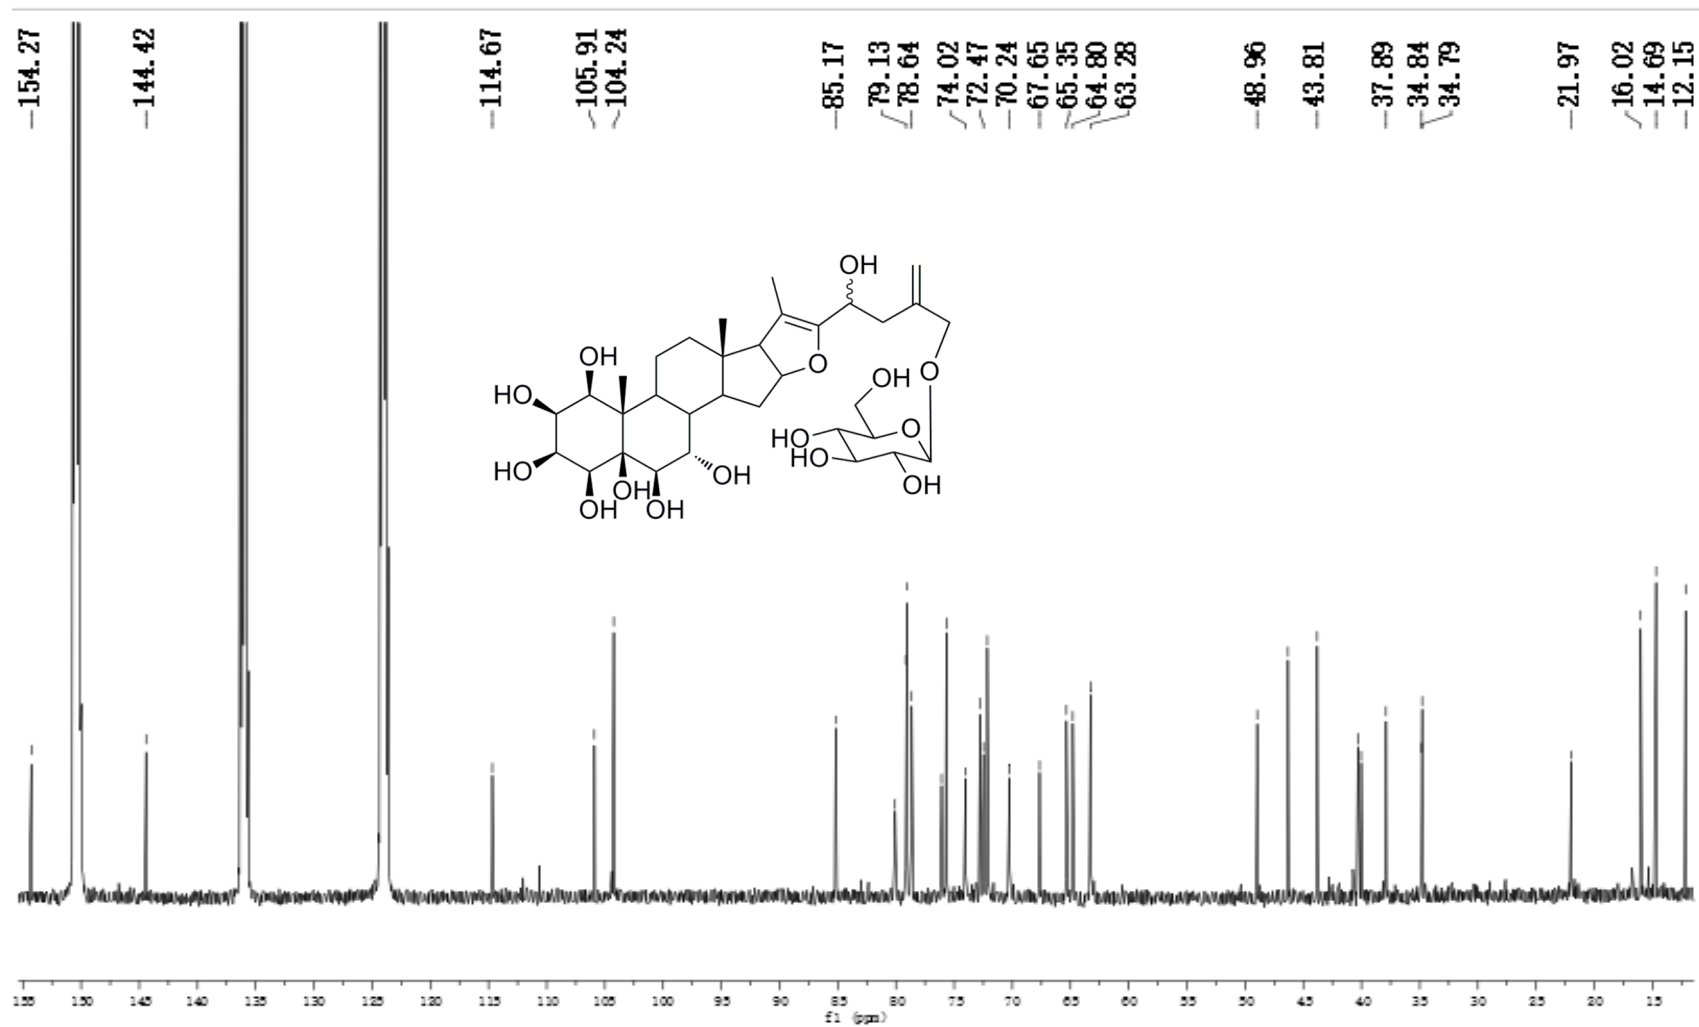

**Figure S11.** The  $^{13}\text{C}$ -NMR spectrum of **2** (in  $\text{C}_5\text{D}_5\text{N}$ ).

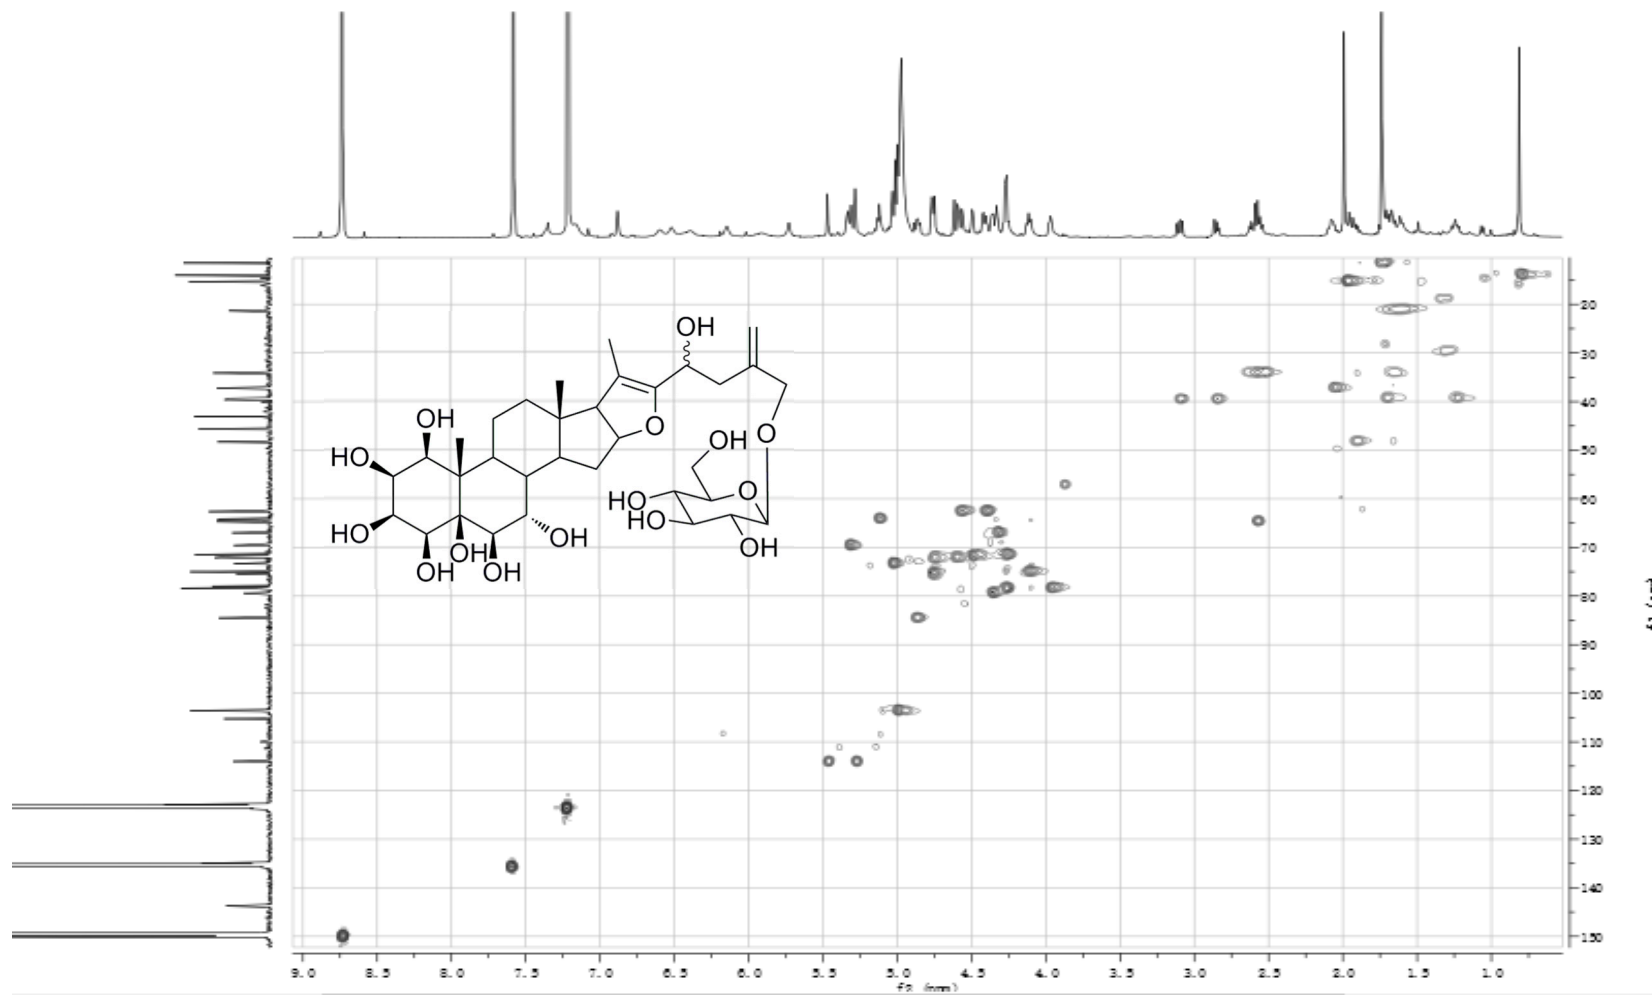

**Figure S12.** The HMQC spectrum of **2** (in  $C_5D_5N$ ).

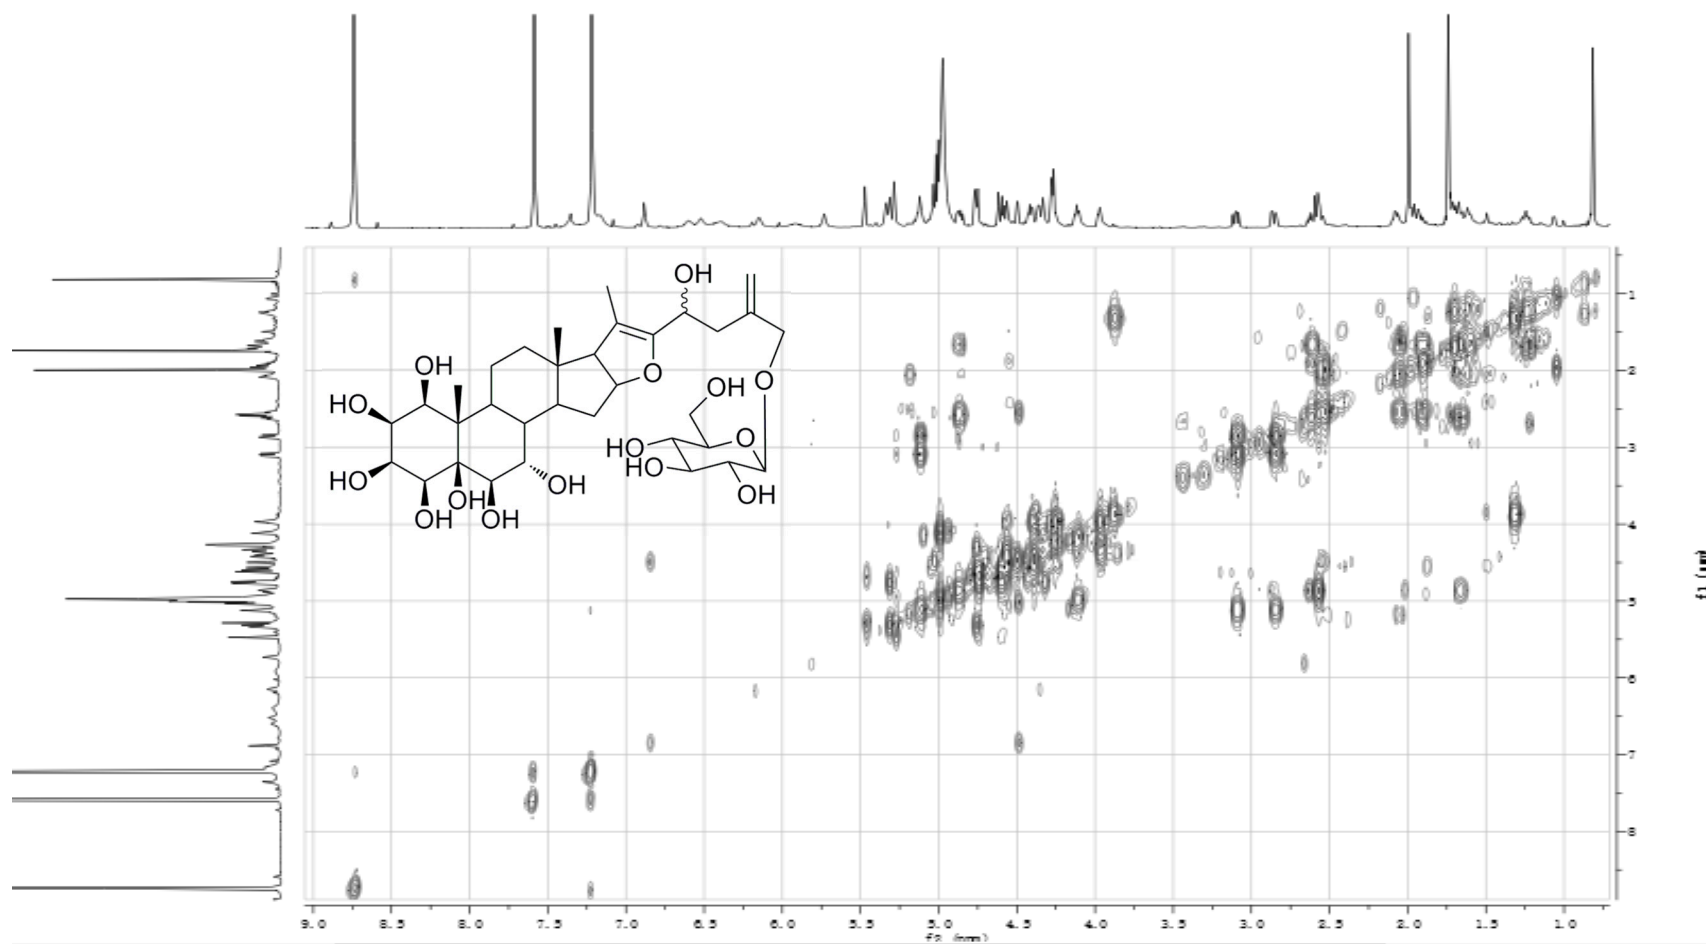

**Figure S13.** The  $^1\text{H}$ - $^1\text{H}$  COSY spectrum of **2** (in  $\text{C}_5\text{D}_5\text{N}$ ).

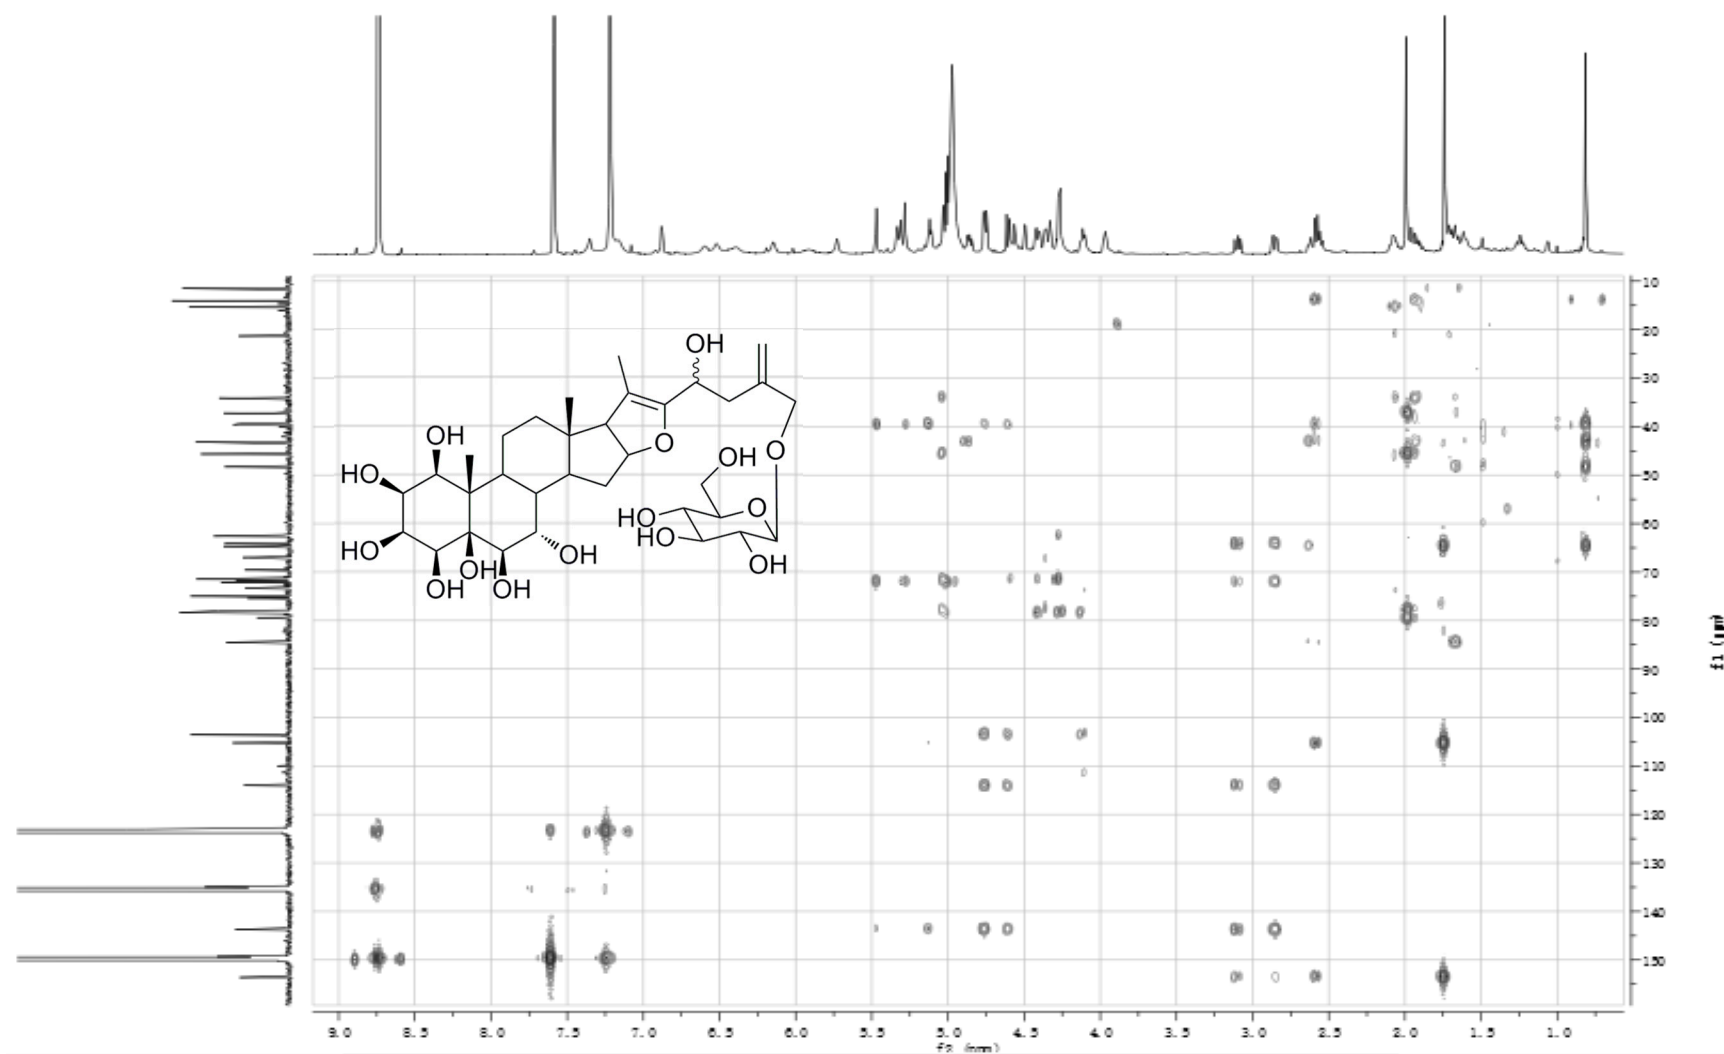

**Figure S14.** The HMBC spectrum of **2** (in  $C_5D_5N$ ).

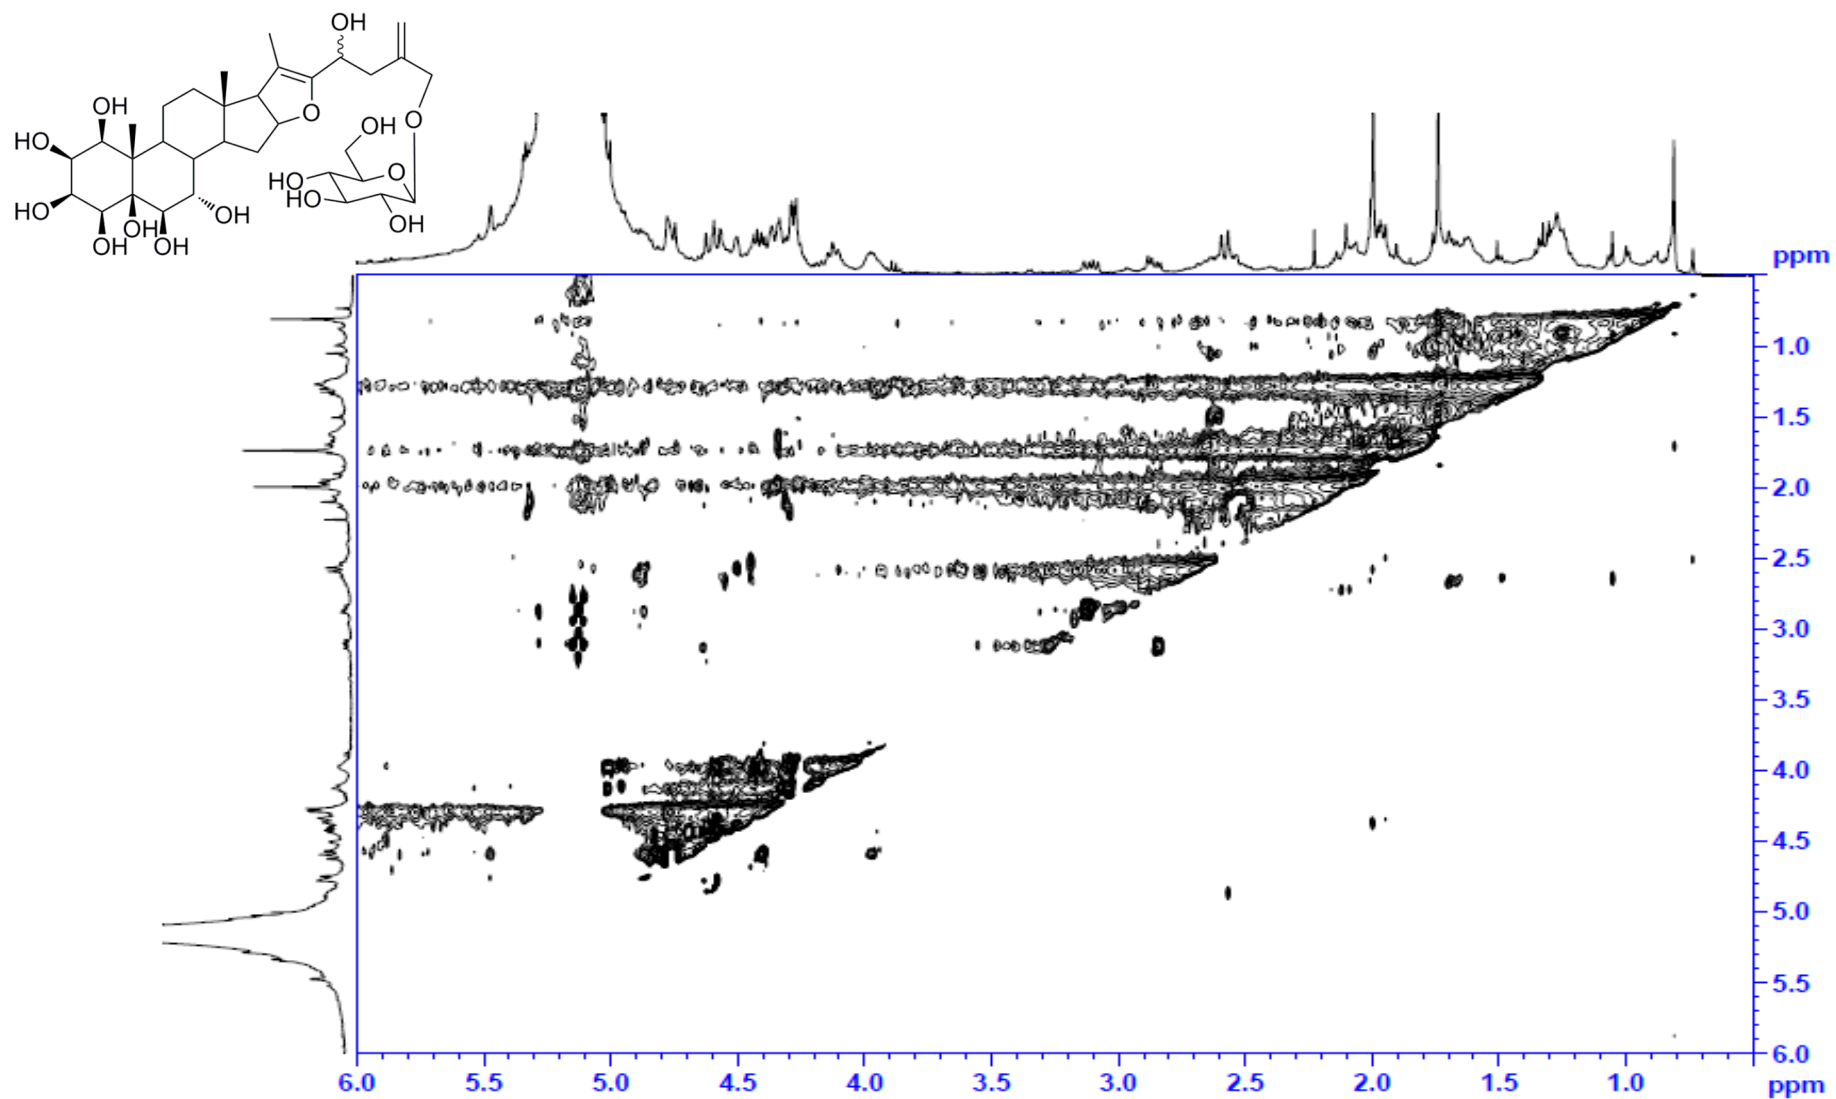

**Figure S15.** The NOESY spectrum of **2** (in C<sub>5</sub>D<sub>5</sub>N).

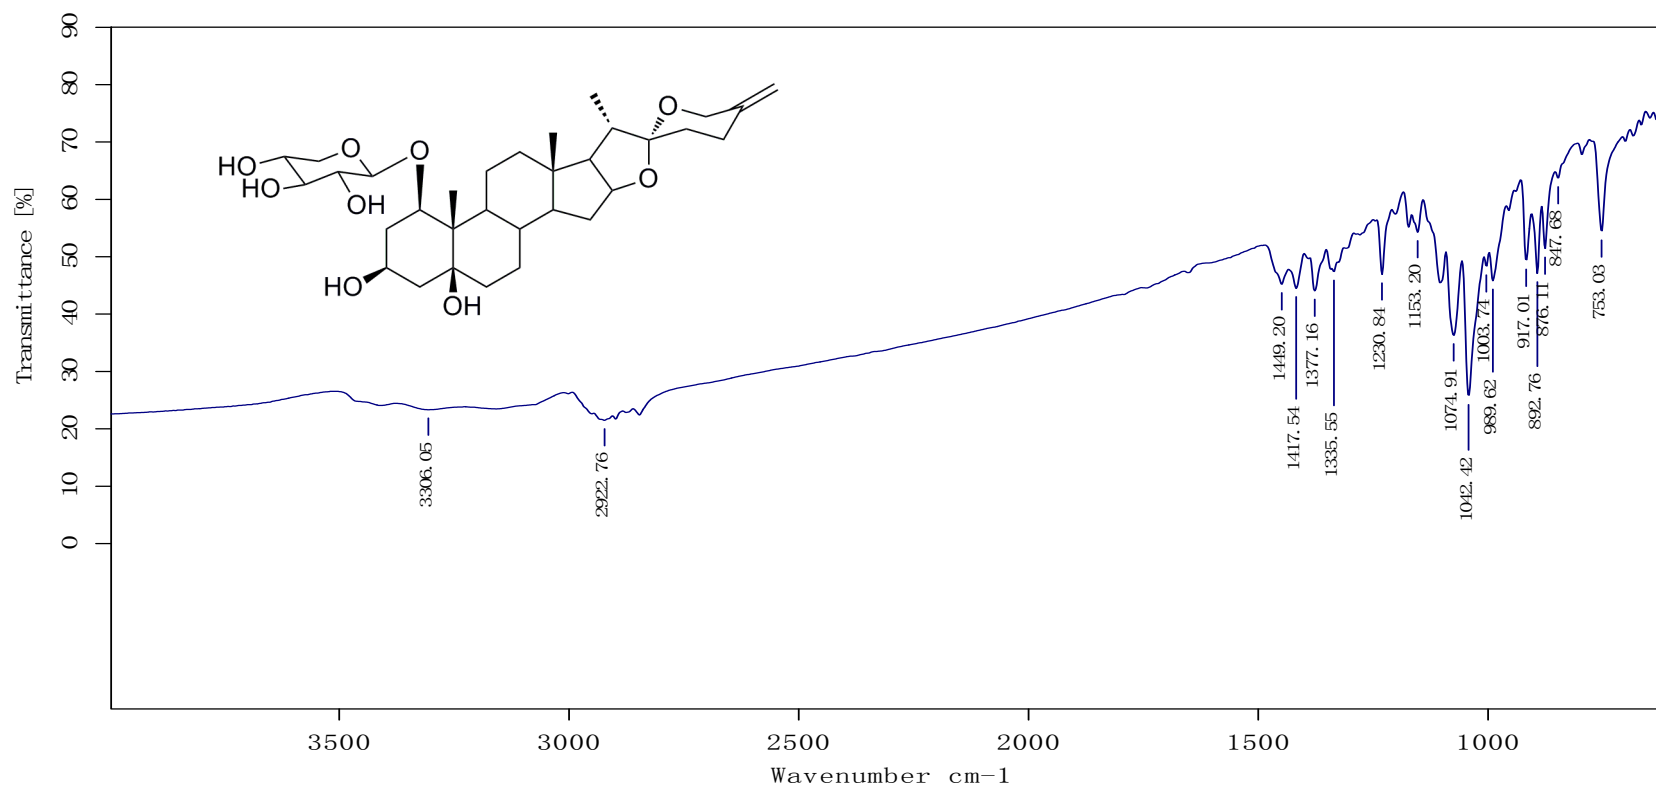

E:\ZDD\Q3-3-1.1

L1样品-2

Instrument type and / or accessory

2015-1-7

**Figure S16.** The IR spectrum of **3** (in KBr).

zzhu\_141230\_1 204 (6.150)

2: TOF MSMS 579.00ES+  
7.09e+001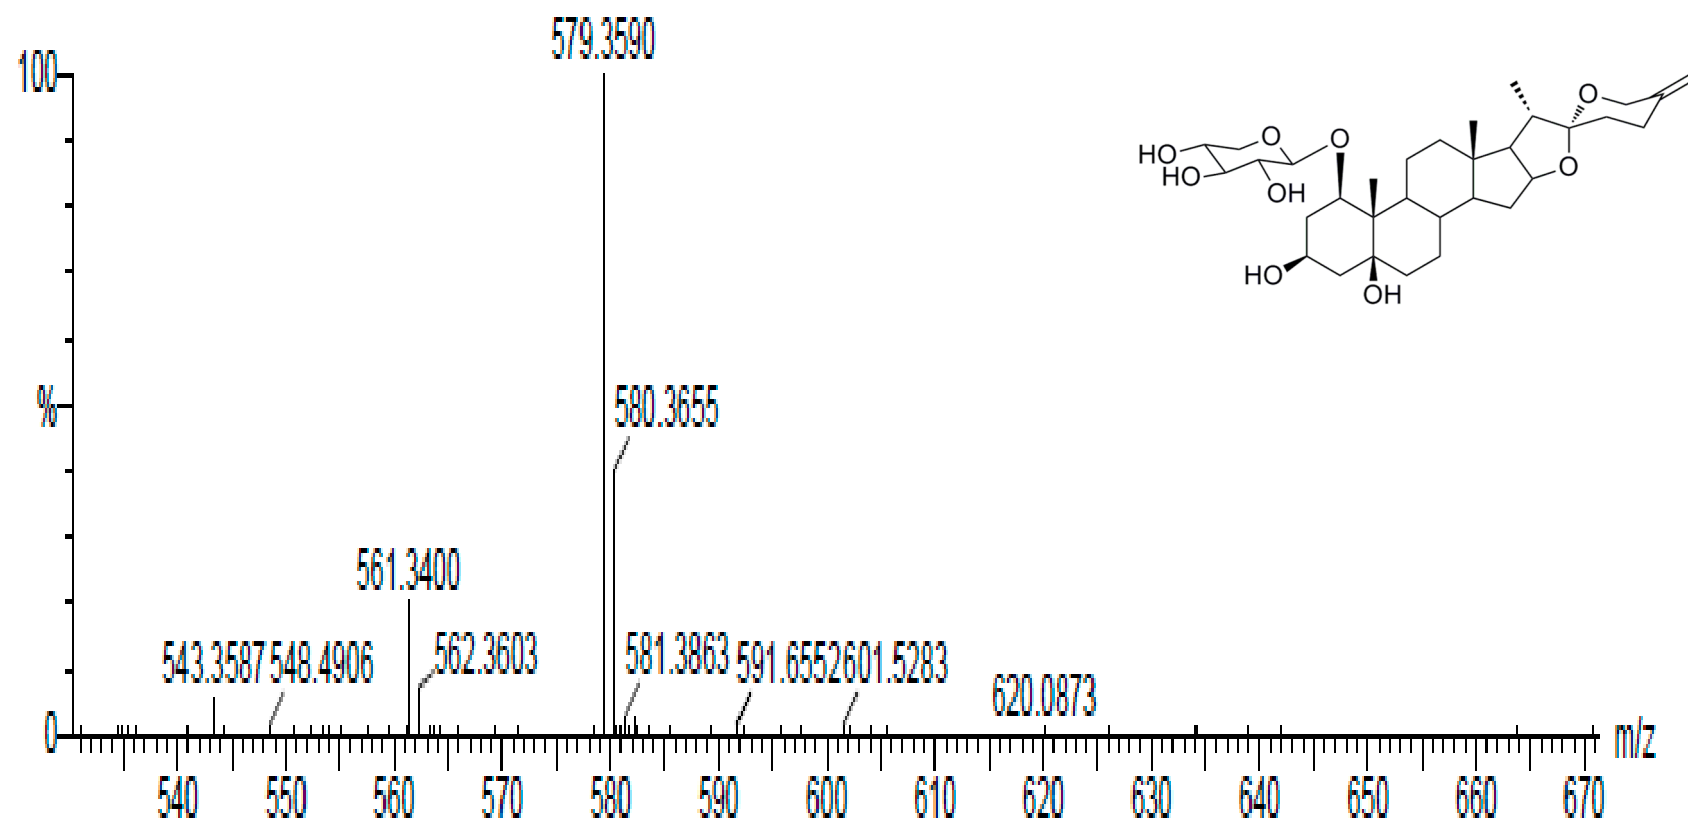**Figure S17.** The HR-ESI-MS spectrum of **3** (in MeOH).

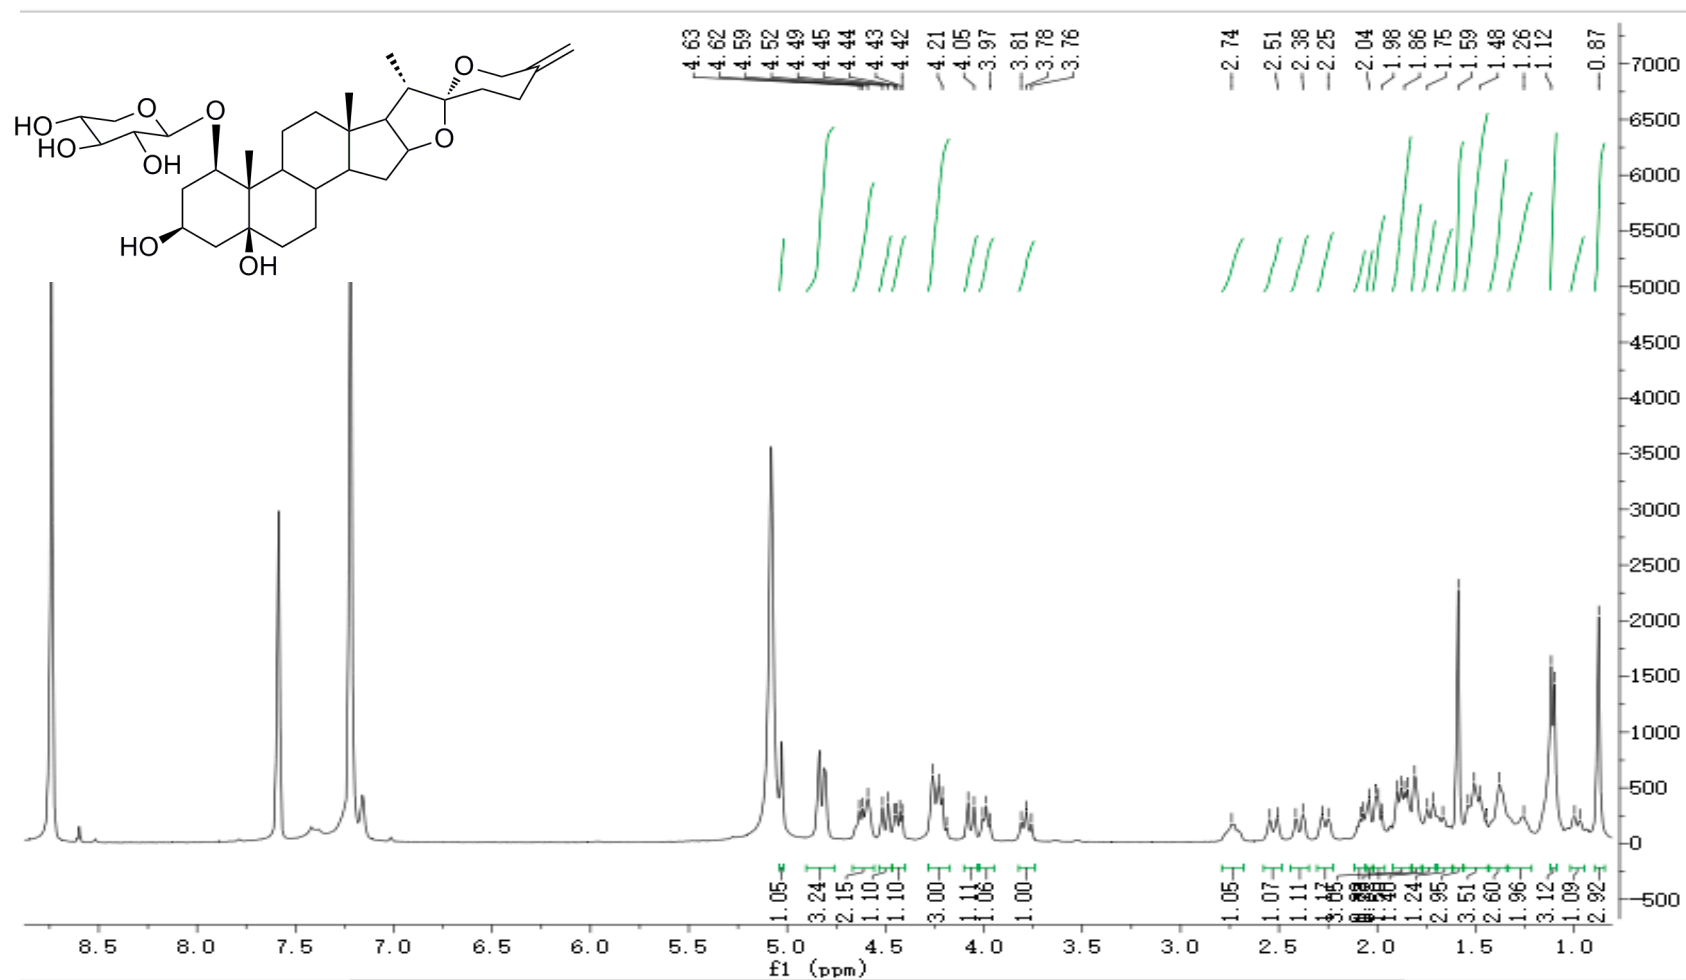

**Figure S18.** The  $^1\text{H}$ -NMR spectrum of **3** (in  $\text{C}_5\text{D}_5\text{N}$ ).

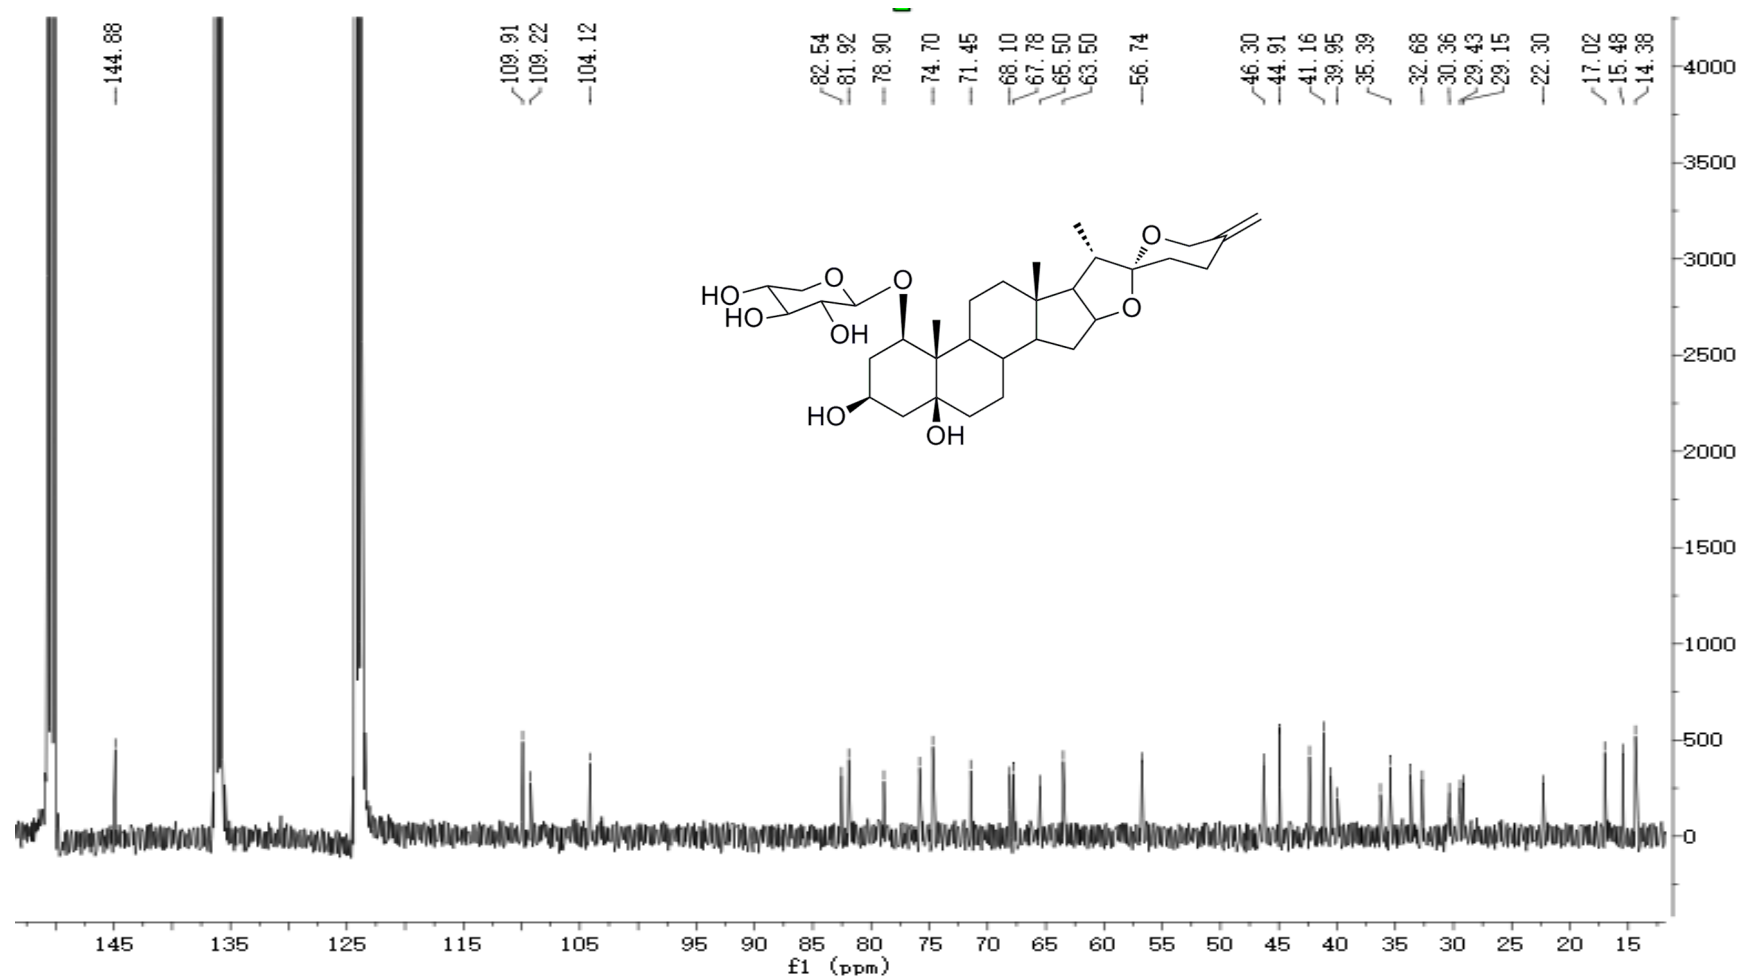

**Figure S19.** The  $^{13}\text{C}$ -NMR spectrum of **3** (in  $\text{C}_5\text{D}_5\text{N}$ ).

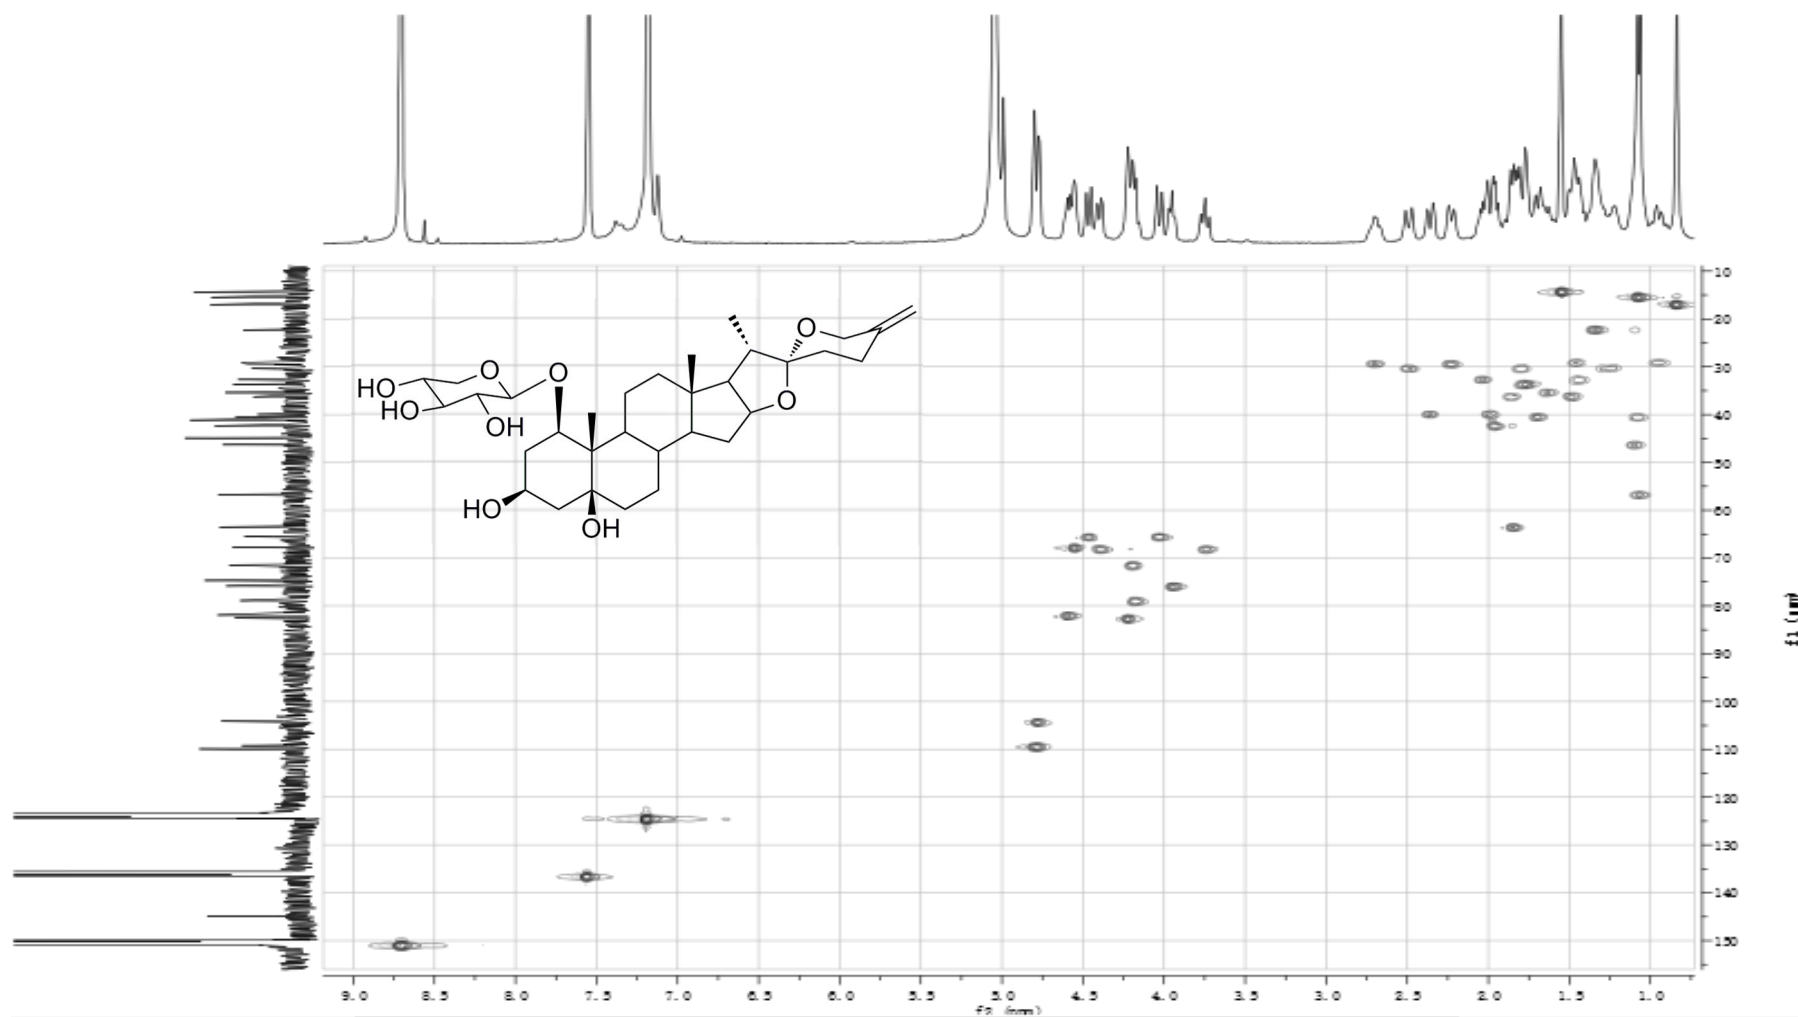

**Figure S20.** The HMQC spectrum of **3** (in  $C_5D_5N$ ).

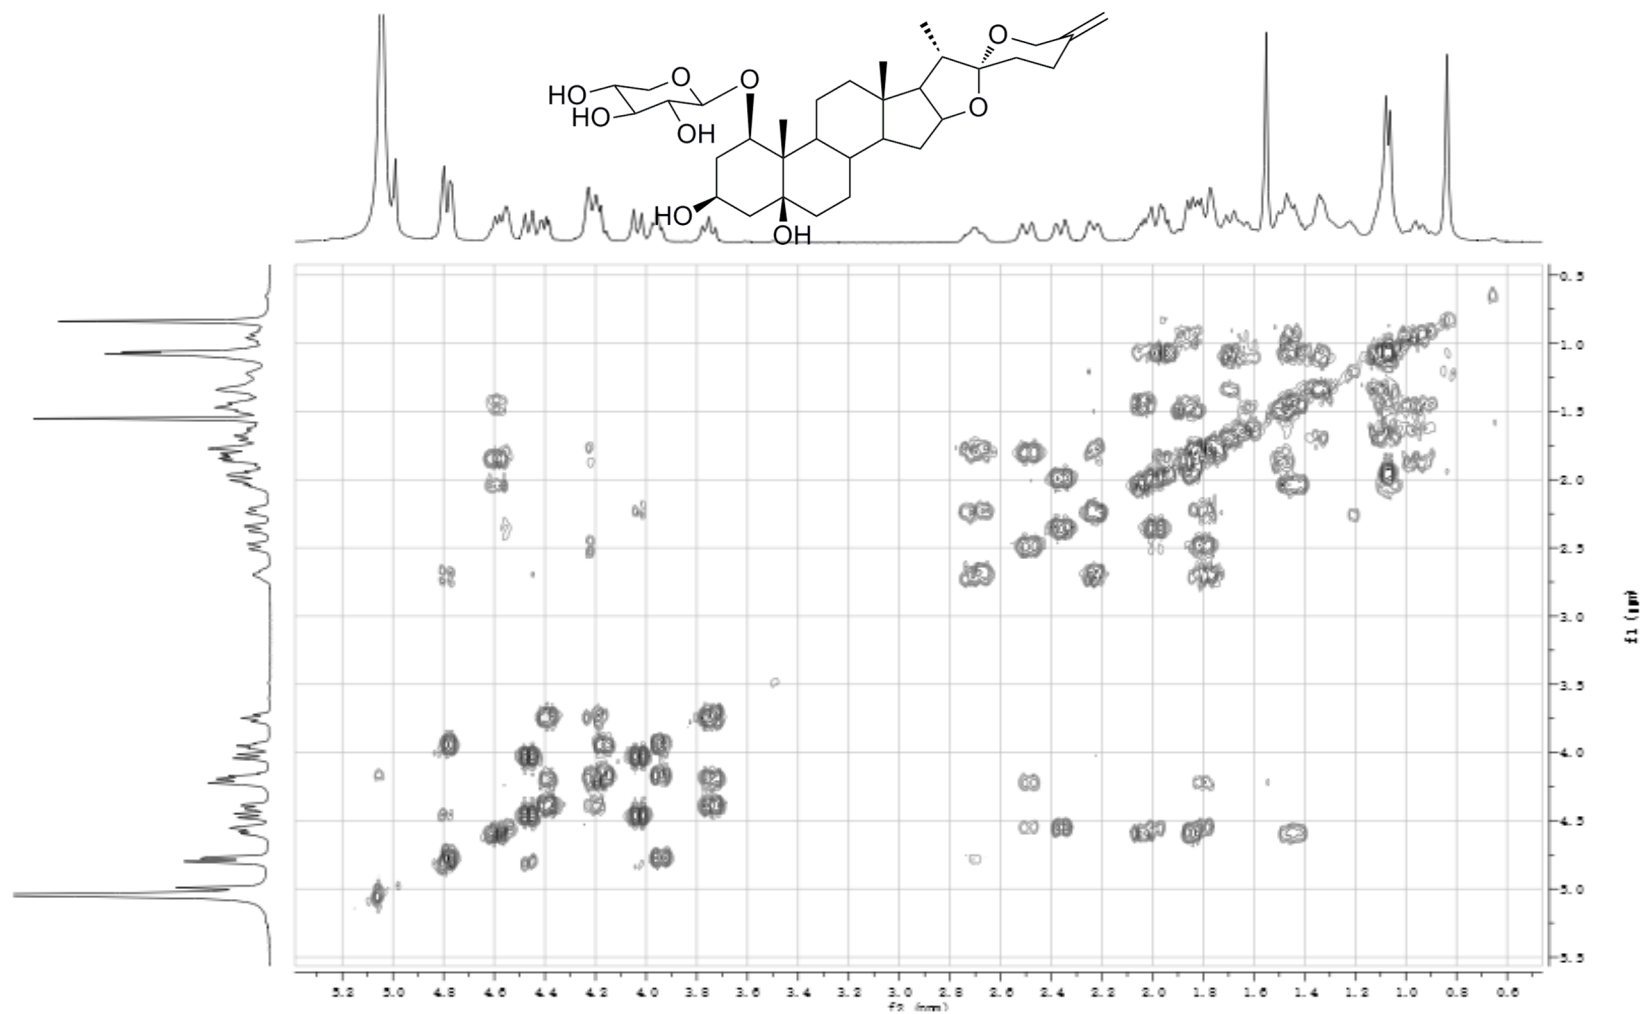

**Figure S21.** The  $^1\text{H}$ - $^1\text{H}$  COSY spectrum of **3** (in  $\text{C}_5\text{D}_5\text{N}$ ).

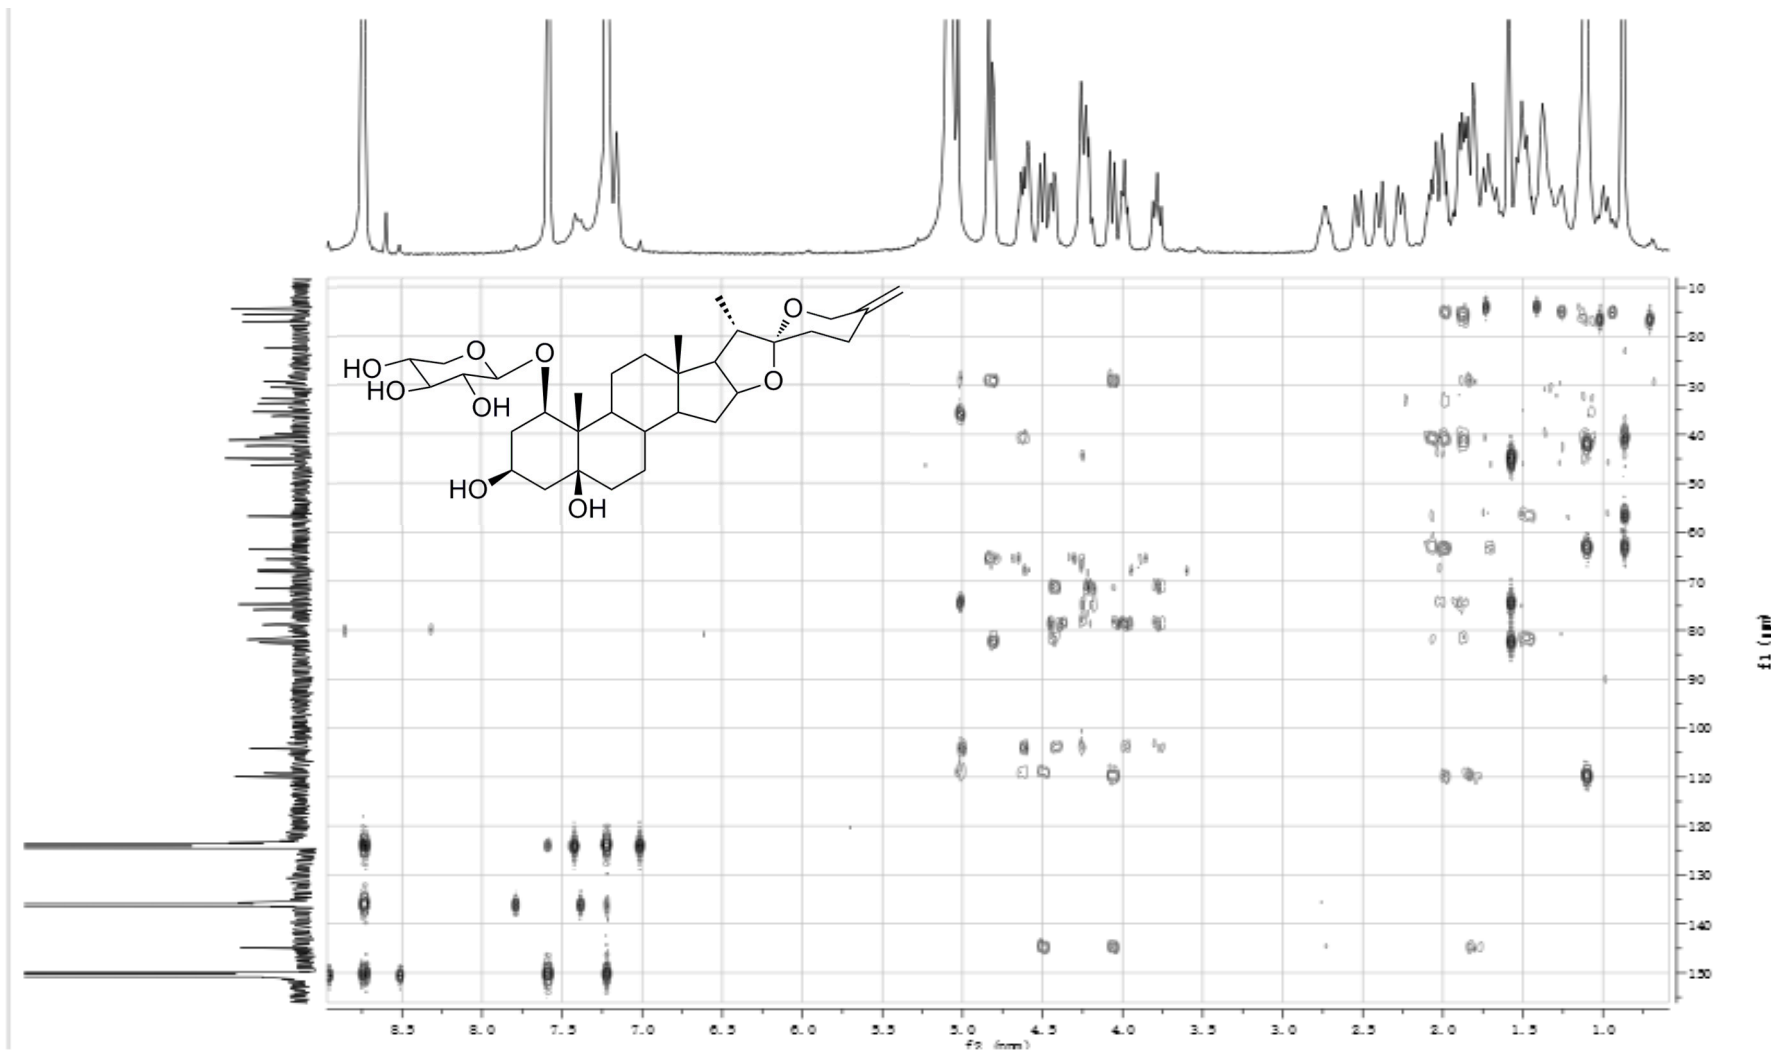

**Figure S22.** The HMBC spectrum of **3** (in  $C_5D_5N$ ).

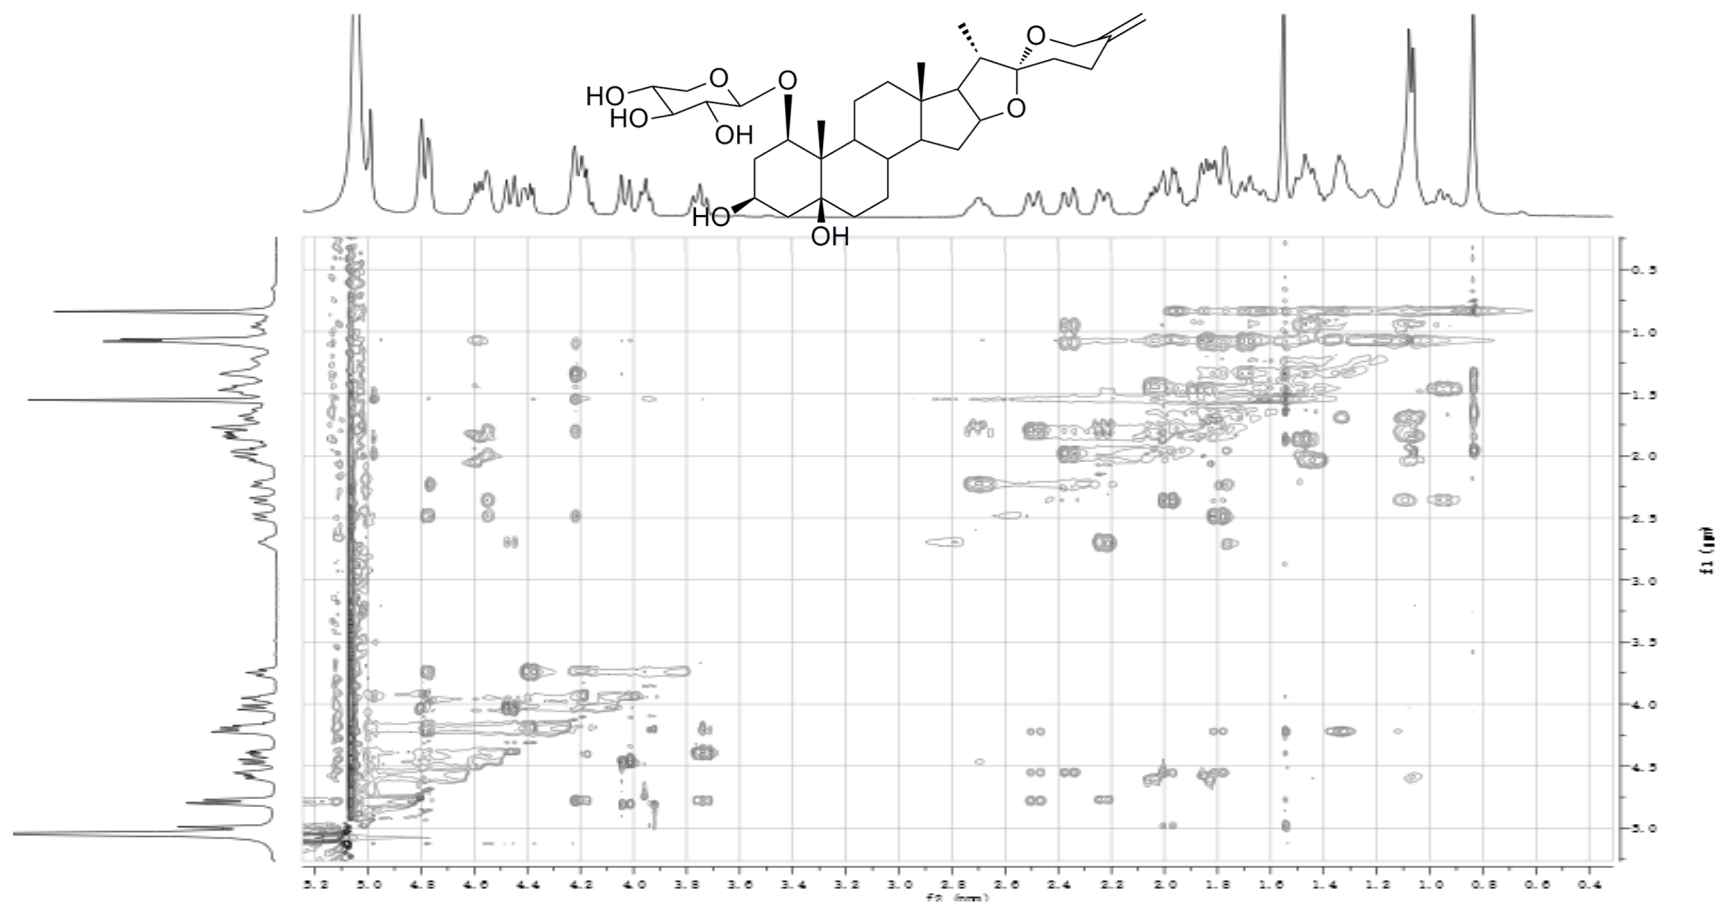

**Figure S23.** The NOESY spectrum of **3** (in  $C_5D_5N$ ).
